# Supplementary material for: Population genetic structure of Texas horned lizards: implications for reintroduction and captive breeding
Source: PeerJ. 2019 Oct 1;7:e7746. doi: 10.7717/peerj.7746 (PMC6777493; doi:10.7717/peerj.7746)
Supplement: Data S1 — These data are the microsatellite genotypes in bp for each individual for 10 loci Pc41-PcD53 (note some alleles are coded as 1 bp different within a locus but they are actually 2 bp different), mitochondrial control region haplotypes are identified by numbers corresponding to numbers in alignment file, latitude and longitude are in decimal degrees/WGS 84, ancestry values are proportion of membership in each of 3 genetic clusters (north, south, west) as defined by STRUCTURE (see text). The site column indicates the samples which were grouped into 16 sites and analyzed for genetic diversity, population differentiation and isolation-by-distance (the coordinates used for these 16 sites are given in the “coordinates for 16 sites” worksheet). [file peerj-07-7746-s006.xlsx]

## Sheet: Genotypes
Sample	Site	Pc41	Pc41	PcD01	PcD01	PcD09	PcD09	Pc70	Pc70	PcD14	PcD14	PcD20	PcD20	PcD52	PcD52	Pc83	Pc83	PcD26	PcD26	PcD53	PcD53	mtDNA control region haplotype	Latitude	Longitude	Ancestry North	Ancestry West	Ancestry South		These data are the microsatellite genotypes in bp for each individual for 10 loci Pc41-PcD53 (note some alleles are coded as 1 bp different within a locus but they are actually 2 bp different), mitochondrial control region haplotypes are identified by numbers corresponding to numbers in alignment file, latitude and longitude are in decimal degrees/WGS 84, ancestry values are proportion of members…
C118	Brewster	144	176	208	234	215	231	240	244	178	206	156	176	134	150	194	210	165	170	185	205	30	29.7168	-103.569	0.1862	0.8078	0.006
Eby	Brewster	178	182	0	0	251	251	232	232	170	194	140	148	150	154	194	210	165	176	185	209	42	29.3228	-103.324	0.0189	0.9721	0.009
KK061	Brewster	166	174	204	206	219	219	244	244	186	202	140	168	158	158	190	226	180	183	185	209	29	30.0338	-103.565	0.0177	0.9793	0.003
KK078	Brewster	148	148	226	246	219	219	244	244	182	194	152	168	158	162	198	222	176	180	185	213	34	30.0287	-103.562	0.0149	0.9821	0.003
KK080	Brewster	168	178	204	226	191	219	236	244	170	178	160	190	158	158	198	198	167	180	185	213	25	30.0239	-103.487	0.0124	0.9846	0.003
KK084	Brewster	170	182	194	226	231	231	224	232	182	204	152	160	158	158	190	198	180	191	185	209	29	30.0341	-103.487	0.0148	0.9832	0.002
KK085	Brewster	148	148	226	246	219	219	232	236	182	186	152	160	158	158	198	198	176	180	185	185	30	30.0108	-103.485	0.01	0.988	0.002
KK091	Brewster	163	186	183	246	191	227	224	244	194	198	152	164	134	134	198	198	170	170	201	201	13	30.0009	-103.489	0.0453	0.9517	0.003
KK092	Brewster	166	186	206	226	191	219	244	244	178	194	154	168	134	158	190	198	165	165	185	273	29	29.9987	-103.49	0.0058	0.9922	0.002
KK095	Brewster	166	176	206	208	191	227	236	244	202	202	160	180	134	150	198	246	170	187	185	273	25	29.9959	-103.471	0.0067	0.9913	0.002
KK096	Brewster	174	178	190	194	191	191	232	248	170	170	140	140	134	134	198	198	176	195	213	281	30	29.9926	-103.477	0.0241	0.9709	0.005
KK097	Brewster	166	186	194	226	191	219	236	252	174	194	160	160	158	158	198	222	176	187	209	253	19	29.987	-103.498	0.0152	0.9788	0.006
KK099	Brewster	148	160	206	237	191	219	236	244	194	222	160	176	158	158	198	198	180	180	201	257	30	30.0088	-103.486	0.0405	0.9565	0.003
KK101	Brewster	148	166	179	187	191	243	236	236	170	186	154	154	134	158	198	242	165	180	201	281	25	30.0229	-103.486	0.0466	0.9434	0.01
KK104	Brewster	163	186	216	250	191	191	232	244	194	202	168	192	134	158	194	198	165	183	209	273	30	30.0032	-103.488	0.009	0.988	0.003
KK106	Brewster	166	182	200	226	231	243	232	232	178	198	140	154	134	150	198	230	167	176	209	277	27	29.9912	-103.493	0.0282	0.9678	0.004
KK107	Brewster	166	178	210	220	191	271	236	244	186	194	160	160	158	162	190	198	170	180	185	257	30	29.9926	-103.477	0.0156	0.9824	0.002
KK108	Brewster	163	186	194	226	223	263	236	252	178	202	168	172	134	134	202	230	176	180	213	311	25	30.0128	-103.477	0.0083	0.9897	0.002
KK109	Brewster	148	171	194	210	219	251	224	232	182	202	156	190	158	158	198	246	167	180	185	201	34	30.0233	-103.487	0.0724	0.9226	0.005
KK111	Brewster	160	182	190	194	243	255	244	244	170	190	154	154	150	162	198	242	165	180	185	209	13	29.9843	-103.513	0.017	0.98	0.003
KK113	Brewster	170	190	194	234	219	251	224	236	174	182	180	184	162	162	198	198	167	172	201	201	25	29.9987	-103.466	0.7435	0.2535	0.003
KK114	Brewster	156	160	196	222	215	227	236	236	178	202	154	172	134	150	198	202	165	187	201	273	25	30.0038	-103.469	0.2808	0.7083	0.0109
KK116	Brewster	163	163	175	194	191	219	236	248	190	204	176	186	158	158	198	198	167	180	201	277	34	30.0198	-103.483	0.0882	0.9078	0.004
M01	Brewster	148	166	194	194	191	227	232	244	174	182	140	140	154	170	198	198	165	170	201	205	24	30.2358	-103.208	0.9228	0.0743	0.0029
M02	Brewster	174	182	198	202	223	227	232	244	174	186	140	140	158	158	198	198	180	183	209	217	24	30.2908	-103.145	0.9651	0.0319	0.003
PH01	Brewster	144	178	175	212	191	231	240	240	174	194	140	144	142	162	198	214	183	191	201	201	71	30.359	-103.688	0.992	0.005	0.003
PH02	Brewster	138	144	198	204	191	223	232	240	186	198	140	186	134	154	198	214	165	183	201	263	30	30.359	-103.688	0.9073	0.0723	0.0204
PH03	Brewster	144	156	194	212	191	219	232	236	186	198	144	152	162	162	198	210	191	195	201	219	30	30.359	-103.688	0.9614	0.0306	0.008
PH04	Brewster	144	174	198	200	219	219	232	244	174	182	144	186	142	166	198	202	165	183	201	201	5	30.359	-103.688	0.99	0.007	0.003
PH05	Brewster	144	178	200	200	219	223	224	244	182	194	168	186	142	166	198	198	183	191	197	201	5	30.359	-103.688	0.9806	0.0164	0.003
PH06	Brewster	144	174	194	208	191	191	240	240	174	198	144	152	162	166	186	202	165	191	201	219	30	30.359	-103.688	0.8581	0.1247	0.0172
CB01	Camp Bowie	156	178	171	216	199	215	232	240	174	186	154	186	158	162	238	242	172	180	201	201	28	31.6319	-98.935	0.992	0.004	0.004
CB02	Camp Bowie	152	174	171	183	211	227	224	232	186	210	154	178	142	162	230	242	172	180	201	257	28	31.6316	-98.9345	0.9853	0.0042	0.0105
CB03	Camp Bowie	170	174	190	220	219	219	224	232	190	198	166	166	154	166	210	218	172	191	265	271	59	31.6504	-98.9526	0.9901	0.0061	0.0038
CB04	Camp Bowie	174	178	198	216	211	227	240	244	166	202	154	154	142	162	198	230	163	180	201	201	59	31.6314	-98.9348	0.9839	0.0111	0.005
CB05	Camp Bowie	174	178	179	216	199	227	220	244	166	170	158	178	142	162	218	222	163	180	201	201	28	31.6324	-98.9303	0.9613	0.0033	0.0354
CB06	Camp Bowie	156	178	190	220	215	227	236	236	170	190	150	170	154	158	206	210	176	191	249	277	28	31.6502	-98.9524	0.7989	0.0859	0.1152
CB07	Camp Bowie	174	174	171	190	199	215	236	240	174	198	170	174	158	162	218	254	155	180	257	289	28	31.6298	-98.9363	0.9778	0.0178	0.0044
CB08	Camp Bowie	174	174	183	220	215	219	224	232	190	198	158	166	154	166	210	266	172	180	217	271	59	31.6499	-98.9524	0.989	0.006	0.005
CB09	Camp Bowie	174	190	220	220	199	211	236	240	178	186	154	170	142	154	218	242	172	183	201	257	28	31.6324	-98.9309	0.993	0.003	0.004
CB10	Camp Bowie	144	186	194	198	215	215	220	236	174	206	154	170	142	170	230	258	172	172	217	217	28	31.6185	-98.954	0.9939	0.003	0.0031
CB11	Camp Bowie	178	186	194	216	199	223	224	228	182	202	154	170	158	158	238	238	176	180	201	201	85	31.6183	-98.9621	0.9374	0.0596	0.003
Chap100868307	Chaparral WMA	160	174	183	190	199	215	220	232	170	178	144	154	142	146	210	214	161	161	197	225	54	28.3113	-99.3496	0.0364	0.0022	0.9614
Chap100878878	Chaparral WMA	138	138	179	179	223	227	212	224	170	170	148	156	142	154	206	214	151	165	217	229		28.291	-99.3701	0.0173	0.0041	0.9786
Chap101336041	Chaparral WMA	160	166	187	204	219	227	232	240	174	194	146	182	142	146	218	218	161	167	209	241	59	28.3006	-99.4104	0.0382	0.0021	0.9597
Chap101338053	Chaparral WMA	160	166	179	190	207	223	228	232	174	186	142	150	146	154	222	222	151	172	209	209	86	28.3261	-99.3632	0.0138	0.002	0.9842
Chap101339567	Chaparral WMA	138	138	179	187	211	219	216	240	170	170	150	156	142	146	218	218	151	180	197	237	61	28.3407	-99.445	0.006	0.001	0.993
Chap101340286	Chaparral WMA	138	160	190	190	215	223	220	236	166	170	134	156	142	146	216	230	151	167	205	233	54	28.3091	-99.3535	0.014	0.002	0.984
Chap101341097	Chaparral WMA	138	156	179	179	207	211	212	232	178	186	144	150	146	146	214	218	172	172	197	257	57	28.3152	-99.3563	0.007	0.001	0.992
Chap101342591	Chaparral WMA	160	166	183	190	231	243	216	216	178	186	134	162	146	150	186	194	161	195	201	205	84	28.3256	-99.4562	0.0486	0.0662	0.8852
Chap101343554	Chaparral WMA	152	174	179	228	203	223	216	232	190	190	134	152	146	150	214	218	151	167	217	233	57	28.3121	-99.3565	0.008	0.0029	0.9891
Chap101345264	Chaparral WMA	138	140	183	187	191	207	232	244	170	174	142	152	142	158	206	214	176	187	225	245	57	28.3282	-99.397	0.0149	0.0108	0.9743
Chap101346079	Chaparral WMA	138	160	183	196	191	195	220	232	182	182	150	154	150	166	218	218	167	172	205	257	57	28.3121	-99.3565	0.108	0.006	0.886
Chap101346892	Chaparral WMA	138	166	179	187	207	219	216	216	182	182	150	156	142	150	186	210	172	191	201	245	3	28.3085	-99.3517	0.0341	0.004	0.9619
Chap2R6L	Chaparral WMA	152	152	179	183	199	215	232	248	166	174	154	160	154	154	222	226	161	183	213	229	8	28.3219	-99.4015	0.071	0.0069	0.9221
Chap2R7L	Chaparral WMA	152	166	183	200	215	215	232	236	170	202	158	162	146	158	214	218	172	191	205	209	34	28.3138	-99.4489	0.5455	0.0132	0.4413
Chap4R7L	Chaparral WMA	144	170	179	190	207	215	212	212	174	178	142	142	142	146	214	214	167	180	201	249	54	28.2964	-99.3581	0.0982	0.002	0.8998
Chap4R8L	Chaparral WMA	178	196	183	196	215	215	220	232	170	194	148	156	146	158	218	230	151	176	201	201	54	28.2963	-99.4082	0.2077	0.0083	0.784
Chap4R9L	Chaparral WMA	148	194	187	200	203	227	216	220	166	170	146	160	134	146	210	226	167	167	201	228	57	28.3342	-99.4246	0.0207	0.0821	0.8972
DLSPF_26	Chaparral WMA	160	166	187	190	215	219	216	232	166	182	152	154	154	158	186	210	151	176	197	245	59	28.326	-99.4076	0.018	0.0055	0.9765
DLSPF_28	Chaparral WMA	156	160	183	187	191	219	232	236	162	166	146	152	142	154	206	218	167	172	241	257	8	28.326	-99.4076	0.0104	0.004	0.9856
DLSPF_29	Chaparral WMA	160	166	187	212	215	227	216	236	170	174	146	184	146	154	210	214	180	195	201	253	57	28.326	-99.4076	0.078	0.0031	0.9189
DLSPF_30	Chaparral WMA	138	156	187	190	195	215	228	244	170	170	142	152	134	146	204	214	163	176	197	253	34	28.326	-99.4076	0.008	0.0139	0.9781
DLSPF_31	Chaparral WMA	138	156	179	204	219	223	216	216	174	190	156	174	146	158	186	214	172	176	217	253	60	28.326	-99.4076	0.0119	0.003	0.9851
DLSPF_32	Chaparral WMA	152	178	187	190	203	207	216	216	166	182	146	152	146	150	222	226	176	176	219	229	61	28.326	-99.4076	0.012	0.0036	0.9844
DLSPF_33	Chaparral WMA	140	156	179	183	203	215	232	236	178	182	144	144	146	150	206	222	167	183	201	201	53	28.326	-99.4076	0.0339	0.002	0.9641
DLSPF_34	Chaparral WMA	156	156	183	242	207	215	216	224	170	178	150	160	146	146	222	226	151	161	217	228	8	28.326	-99.4076	0.0073	0.002	0.9907
DLSPF_35	Chaparral WMA	156	160	183	190	215	215	216	248	170	186	148	160	154	154	214	218	167	172	201	213	8	28.326	-99.4076	0.0345	0.003	0.9625
DLSPF_36	Chaparral WMA	138	166	183	212	219	219	216	216	162	178	152	178	150	154	214	228	151	176	201	209	59	28.326	-99.4076	0.0211	0.0057	0.9732
DLSPF_37	Chaparral WMA	160	170	190	194	207	211	216	248	174	174	138	148	142	150	222	222	176	180	205	237	57	28.326	-99.4076	0.0258	0.003	0.9712
DLSPF_38	Chaparral WMA	138	166	183	190	203	215	232	252	162	162	150	152	142	142	216	218	176	195	201	217	59	28.326	-99.4076	0.016	0.003	0.981
DLSPF_39	Chaparral WMA	152	152	198	216	207	215	224	228	170	170	136	178	154	154	218	228	172	180	229	257	83	28.326	-99.4076	0.063	0.004	0.933
DLSPF_40	Chaparral WMA	138	152	190	194	203	207	216	224	162	166	142	160	142	150	208	222	167	176	201	201	57	28.326	-99.4076	0.0257	0.003	0.9713
DLSPF_41	Chaparral WMA	156	160	187	194	223	223	220	224	174	194	142	142	146	150	206	206	151	172	205	253	59	28.326	-99.4076	0.016	0.0029	0.9811
DLSPF_42	Chaparral WMA	138	182	179	183	215	235	224	232	166	186	158	196	146	158	200	218	167	187	201	233	84	28.326	-99.4076	0.5428	0.0086	0.4486
DLSPF_43	Chaparral WMA	152	166	187	187	207	219	220	220	166	170	134	156	142	146	216	222	172	180	201	205	12	28.326	-99.4076	0.0141	0.002	0.9839
DLSPF_44	Chaparral WMA	138	166	183	187	207	223	216	232	170	190	152	180	142	142	210	222	172	187	213	253	57	28.326	-99.4076	0.0222	0.0054	0.9724
DLSPF_45	Chaparral WMA	152	152	190	216	211	215	224	224	162	174	144	148	146	158	210	214	151	161	225	241	57	28.326	-99.4076	0.01	0.003	0.987
DLSPF_46	Chaparral WMA	160	166	187	190	199	215	228	232	166	166	144	146	150	162	206	214	167	172	205	209	54	28.326	-99.4076	0.2945	0.002	0.7035
DLSPF_47	Chaparral WMA	152	182	179	198	211	227	236	244	174	194	144	152	154	154	206	216	172	176	245	249	34	28.326	-99.4076	0.2353	0.0189	0.7458
DLSPF_48	Chaparral WMA	160	182	187	194	211	227	224	244	174	202	156	168	146	154	210	210	172	172	201	269	87	28.326	-99.4076	0.9298	0.0104	0.0598
DLSPF_49	Chaparral WMA	138	160	216	216	211	223	232	236	182	194	142	154	150	166	206	208	151	172	201	225	8	28.326	-99.4076	0.0629	0.005	0.9321
PHCO_01	Chaparral WMA	138	166	183	228	207	211	216	240	162	174	142	142	146	150	210	238	161	167	225	241	57	28.326	-99.4076	0.0061	0.002	0.9919
PHCO_02	Chaparral WMA	138	138	179	187	203	215	216	236	170	174	134	156	142	154	202	210	159	172	197	201	57	28.326	-99.4076	0.0154	0.002	0.9826
PHCO_03	Chaparral WMA	160	170	183	187	207	223	216	232	190	194	138	168	142	162	218	220	176	176	197	253	57	28.326	-99.4076	0.6833	0.004	0.3127
PHCO_05	Chaparral WMA	156	160	187	194	207	227	240	244	186	186	158	160	146	150	194	222	151	172	233	241	62	28.326	-99.4076	0.0243	0.01	0.9657
PHCO_06	Chaparral WMA	160	178	183	187	223	223	216	236	162	202	152	158	154	154	210	218	172	176	201	201	57	28.326	-99.4076	0.4687	0.0046	0.5267
PHCO_07	Chaparral WMA	166	170	183	187	219	227	216	216	170	174	150	150	154	158	222	222	172	176	197	237	12	28.326	-99.4076	0.0149	0.002	0.9831
PHCO_08	Chaparral WMA	170	170	183	190	219	223	240	240	174	174	150	154	146	150	214	222	167	167	225	249	60	28.326	-99.4076	0.0673	0.008	0.9247
PHCO_09	Chaparral WMA	138	138	190	190	203	223	232	232	170	182	142	160	146	158	210	222	161	176	233	257	57	28.326	-99.4076	0.009	0.003	0.988
PHCO_10	Chaparral WMA	138	166	179	183	203	215	216	244	174	174	156	156	146	154	196	202	176	187	197	225	34	28.326	-99.4076	0.041	0.0152	0.9438
PHCO_11	Chaparral WMA	152	156	179	194	211	215	216	224	162	162	134	138	142	154	210	234	151	167	201	237	8	28.326	-99.4076	0.0173	0.002	0.9807
PHCO_12	Chaparral WMA	138	152	187	242	215	215	220	248	166	166	150	184	142	150	194	206	151	161	201	213	59	28.326	-99.4076	0.012	0.003	0.985
PHCO_13	Chaparral WMA	152	170	179	179	195	215	224	244	178	178	160	184	146	150	206	218	167	167	197	197	77	28.326	-99.4076	0.0217	0.0055	0.9728
PHCO_14	Chaparral WMA	160	178	183	187	215	215	232	232	182	182	140	170	146	158	202	230	151	180	253	253	54	28.326	-99.4076	0.6184	0.009	0.3726
PHCO_15	Chaparral WMA	138	160	179	179	207	211	216	240	170	174	154	160	142	158	218	234	172	176	209	217	76	28.326	-99.4076	0.0287	0.004	0.9673
PHCO_16	Chaparral WMA	156	166	183	190	211	215	220	232	170	174	152	156	134	146	206	218	176	183	197	229	57	28.326	-99.4076	0.009	0.009	0.982
PHCO_17	Chaparral WMA	160	174	183	228	195	223	216	220	166	178	142	152	142	154	218	218	167	180	201	201	57	28.326	-99.4076	0.0365	0.002	0.9615
PHCO_18	Chaparral WMA	156	166	187	190	211	227	220	220	170	182	136	138	146	158	206	214	151	151	197	241	82	28.326	-99.4076	0.008	0.002	0.99
PHCO_19	Chaparral WMA	138	138	187	187	215	235	232	236	174	178	140	152	146	146	214	214	167	176	201	209	62	28.326	-99.4076	0.1649	0.0044	0.8307
PHCO_20	Chaparral WMA	138	156	179	190	195	207	216	232	182	186	138	174	146	146	202	230	151	167	197	225	60	28.326	-99.4076	0.0168	0.0021	0.9811
PHCO_21	Chaparral WMA	166	170	190	194	199	215	224	232	186	202	138	138	142	162	198	206	167	176	209	217	83	28.326	-99.4076	0.9724	0.0059	0.0217
PHCO_22	Chaparral WMA	138	170	187	190	195	203	232	236	162	186	148	168	142	158	218	246	161	172	197	245	86	28.326	-99.4076	0.0553	0.009	0.9357
PHCO_23	Chaparral WMA	152	156	179	183	211	215	220	252	182	186	150	160	150	150	210	216	151	151	217	229	82	28.326	-99.4076	0.008	0.005	0.987
PHCO_25	Chaparral WMA	138	160	202	228	223	227	216	228	166	182	150	156	158	162	204	218	167	167	245	257	61	28.326	-99.4076	0.0919	0.0071	0.901
CMA_52	CMA	144	174	171	171	199	203	236	248	174	182	196	206	142	166	198	218	183	183	201	201	46	35.4197	-101.947	0.995	0.002	0.003
CMA_53	CMA	138	170	171	204	219	223	236	252	182	198	140	152	142	146	226	226	165	180	201	281	46	35.4197	-101.947	0.7526	0.1365	0.1109
CMA_54	CMA	144	152	198	204	215	235	228	236	174	182	140	162	158	162	202	250	180	187	201	217	46	35.4197	-101.947	0.993	0.004	0.003
CMA_55	CMA	166	174	183	183	219	219	224	240	186	202	176	186	154	162	210	242	172	187	201	201	30	35.4197	-101.947	0.9798	0.0112	0.009
CMA_56	CMA	144	152	190	190	199	231	224	240	174	182	180	182	166	166	198	198	172	187	201	285	46	35.4197	-101.947	0.994	0.003	0.003
CMA_57	CMA	144	160	208	208	215	239	228	232	174	186	184	190	162	166	198	198	180	187	201	201	52	35.4197	-101.947	0.994	0.003	0.003
CMA_58	CMA	156	178	171	204	195	215	232	236	178	198	158	186	142	142	198	218	170	172	201	201	30	35.4197	-101.947	0.99	0.005	0.005
CMA_59	CMA	160	174	171	208	199	215	232	236	182	186	164	184	146	158	198	214	155	183	201	201	46	35.4197	-101.947	0.993	0.003	0.004
CMA_60	CMA	160	174	190	194	199	219	228	236	178	190	188	206	162	166	198	230	187	187	201	201	50	35.4197	-101.947	0.9943	0.0037	0.002
CMA_61	CMA	148	166	190	200	199	227	236	248	182	186	186	190	158	166	214	234	165	183	201	201	30	35.4197	-101.947	0.993	0.004	0.003
CMA_62	CMA	152	170	194	202	199	215	232	244	170	178	140	154	142	162	226	258	167	172	201	205	46	35.4197	-101.947	0.9899	0.004	0.0061
CMA_63	CMA	166	174	190	220	215	219	240	240	166	190	156	186	154	166	198	214	176	187	201	201	46	35.4197	-101.947	0.9921	0.0029	0.005
CMA_64	CMA	166	174	198	198	223	223	232	240	170	178	184	190	158	162	218	242	172	195	201	213	46	35.4197	-101.947	0.9819	0.006	0.0121
CMA_65	CMA	144	170	190	200	199	215	236	244	174	194	140	140	158	170	222	242	172	176	201	201	52	35.4197	-101.947	0.994	0.003	0.003
CMA_67	CMA	148	160	190	194	207	215	228	240	182	202	156	186	162	166	198	198	180	191	201	217	30	35.4197	-101.947	0.9936	0.003	0.0034
CMA_68	CMA	144	160	171	206	207	231	240	240	194	202	158	168	142	166	198	230	176	180	201	201	30	35.4197	-101.947	0.991	0.006	0.003
CMA_69	CMA	144	148	198	198	223	231	228	232	178	182	168	168	154	158	198	214	172	180	201	201	30	35.4197	-101.947	0.994	0.003	0.003
CMA_70	CMA	160	182	198	200	199	219	232	244	178	194	178	186	142	142	218	218	180	187	201	217	30	35.4197	-101.947	0.991	0.004	0.005
CMA_71	CMA	144	170	194	194	215	215	224	236	186	190	150	192	142	146	190	282	183	187	201	217	46	35.4197	-101.947	0.986	0.008	0.006
CMA_72	CMA	156	178	175	198	219	223	236	240	174	178	152	174	142	142	198	238	183	195	201	201	30	35.4197	-101.947	0.977	0.0062	0.0168
CO1	Colorado	148	152	171	187	215	243	220	228	182	234	160	194	142	158	230	262	180	183	269	289	34	37.6078	-102.46	0.7288	0.2652	0.006
CO10	Colorado	144	166	198	204	207	227	240	248	186	194	144	154	146	158	242	242	165	180	201	201	46	37.6594	-102.545	0.989	0.005	0.006
CO11	Colorado	152	166	190	208	199	231	232	236	190	198	152	176	134	142	238	246	165	176	197	277	35	37.6336	-102.537	0.4316	0.5373	0.0311
CO12	Colorado	148	156	210	210	235	235	232	236	262	271	194	198	142	146	258	258	167	176	205	217	2	37.7698	-103.621	0.9813	0.0128	0.0059
CO13	Colorado	166	178	260	264	227	251	228	232	190	230	160	178	146	158	266	270	180	183	197	264	46	37.6336	-102.537	0.2322	0.7345	0.0332
CO14	Colorado	178	178	171	208	199	239	228	232	182	210	144	156	166	170	234	254	180	187	201	205	35	37.6594	-102.545	0.994	0.003	0.003
CO2	Colorado	170	178	210	210	199	223	224	228	182	194	174	174	142	162	238	262	180	180	261	261	34	37.2358	-102.724	0.8565	0.1395	0.004
CO3	Colorado	170	178	190	198	231	231	236	240	186	202	154	164	150	158	242	242	167	167	197	201	34	37.6145	-102.821	0.9172	0.0778	0.005
CO4	Colorado	152	166	208	216	231	235	228	240	186	198	144	154	142	166	206	262	180	203	201	269	34	37.6078	-102.46	0.9849	0.0091	0.006
CO5	Colorado	174	178	202	210	223	235	240	240	182	202	160	202	142	146	246	254	167	172	201	205	46	37.6078	-102.46	0.981	0.013	0.006
CO6	Colorado	144	148	194	194	223	227	232	240	178	186	174	186	146	158	202	285	165	165	201	249	35	37.6078	-102.46	0.977	0.018	0.005
CO7	Colorado	144	144	202	220	223	227	232	248	186	206	164	194	146	150	234	273	165	187	205	217	35	37.6078	-102.46	0.9907	0.0053	0.004
CO8	Colorado	144	174	216	232	211	215	228	228	194	198	138	202	142	162	250	270	165	199	201	201	46	37.6078	-102.46	0.9886	0.008	0.0034
NM10_01	E. New Mexico	148	156	187	212	199	223	232	236	194	202	192	194	142	146	198	198	180	187	201	201	46	32.464	-103.087	0.991	0.004	0.005
NM10_02	E. New Mexico	138	148	187	194	231	239	216	236	190	194	154	174	142	170	198	198	191	195	201	201	78	32.4587	-103.087	0.955	0.0057	0.0393
NM10_03	E. New Mexico	148	186	194	200	199	215	236	240	178	194	150	176	154	162	218	258	165	191	201	264	35	32.4551	-103.102	0.9873	0.0086	0.0041
NM10_04	E. New Mexico	144	182	200	210	215	227	232	236	174	198	154	194	154	166	198	202	165	176	201	217	41	32.4459	-103.106	0.991	0.006	0.003
NM10_05	E. New Mexico	148	156	171	190	223	243	236	240	174	186	144	164	154	162	202	210	187	195	201	201	46	32.4628	-103.095	0.9764	0.0176	0.006
NM10_06	E. New Mexico	144	166	190	194	199	223	236	244	174	210	164	176	142	158	198	198	167	180	201	269	44	32.4602	-103.083	0.989	0.007	0.004
NM10_07	E. New Mexico	144	160	190	208	211	223	228	240	178	186	140	168	150	166	226	266	155	155	201	201	46	32.4406	-103.074	0.9929	0.0031	0.004
NM10_08	E. New Mexico	144	152	179	204	215	219	240	240	178	186	168	174	166	170	198	198	180	183	201	201	46	32.4552	-103.102	0.9908	0.0043	0.0049
NM10_09	E. New Mexico	144	156	187	210	223	223	240	240	186	186	160	172	142	142	198	202	183	191	217	257	34	32.464	-103.097	0.987	0.008	0.005
NM10_10	E. New Mexico	138	156	190	220	223	227	236	244	186	194	140	220	146	170	206	230	167	187	201	201	46	32.4569	-103.102	0.918	0.0196	0.0624
NM10_11	E. New Mexico	144	144	190	198	199	219	224	232	182	182	184	186	158	174	198	202	155	167	201	201	30	32.4425	-103.085	0.9946	0.003	0.0024
NM10_12	E. New Mexico	144	160	183	198	223	227	236	240	190	194	186	192	142	154	198	198	172	191	201	217	45	32.4578	-103.086	0.994	0.002	0.004
NM10_13	E. New Mexico	148	166	179	194	211	223	232	236	182	186	168	200	158	176	202	218	165	172	217	217	48	32.4425	-103.085	0.9821	0.0087	0.0092
NM10_14	E. New Mexico	144	178	175	208	215	227	232	240	166	174	154	204	158	162	198	214	172	180	201	201	46	32.4644	-103.086	0.99	0.004	0.006
NM10_15	E. New Mexico	160	170	171	187	223	231	240	240	182	198	140	160	142	154	198	226	172	207	201	205	34	32.4643	-103.096	0.9879	0.0081	0.004
NM10_16	E. New Mexico	144	170	190	198	215	223	228	244	178	182	154	170	142	142	206	234	167	195	201	201	46	32.4643	-103.095	0.9901	0.003	0.0069
NM10_17	E. New Mexico	156	166	194	183	199	223	236	257	174	182	156	190	150	154	198	198	191	195	201	201	35	32.4639	-103.086	0.9815	0.007	0.0115
NM10_18	E. New Mexico	144	156	183	232	211	227	220	228	182	202	144	186	146	150	198	282	176	183	201	217	37	32.4425	-103.086	0.9796	0.003	0.0174
ABGF09	Grey Co.	160	166	167	167	211	215	224	232	178	182	174	176	142	166	220	220	183	191	201	253	28	35.4228	-100.603	0.9899	0.0027	0.0074
JPB02	Grey Co.	178	190	187	194	215	227	232	232	182	198	140	182	166	170	218	230	176	180	201	201	28	35.5395	-100.979	0.9945	0.002	0.0035
JPB09-1	Grey Co.	148	152	175	212	215	231	228	232	170	178	190	194	146	158	214	214	167	176	201	201	52	35.3478	-100.771	0.9635	0.004	0.0325
JPB09-2	Grey Co.	144	160	171	190	199	231	224	240	182	198	150	166	150	158	198	198	180	203	197	201	28	35.3689	-100.701	0.994	0.003	0.003
JPB09-3	Grey Co.	156	156	194	208	199	223	224	244	174	186	158	178	142	146	198	234	170	176	201	205	80	35.2912	-100.716	0.9808	0.0129	0.0063
JPB09-4	Grey Co.	144	170	171	187	199	219	220	232	182	190	174	196	154	154	230	242	180	187	201	201	65	35.5624	-100.954	0.994	0.002	0.004
JPB09-5	Grey Co.	148	174	187	204	231	235	232	240	182	198	166	176	142	146	210	226	167	180	217	264	28	35.3867	-100.725	0.982	0.004	0.014
JPB09-6	Grey Co.	148	148	194	220	227	231	224	228	170	198	164	188	150	154	226	230	183	187	209	263	28	35.3949	-100.727	0.9808	0.0152	0.004
JPB09-7	Grey Co.	170	170	208	212	199	223	220	232	190	194	160	162	154	158	198	214	172	180	201	217	34	35.3403	-100.76	0.987	0.007	0.006
JPB09-8	Grey Co.	166	178	190	194	195	219	224	232	182	194	164	172	146	154	214	234	172	176	201	201	32	35.3574	-100.679	0.9817	0.0058	0.0125
JPB09-9	Grey Co.	152	174	190	220	199	227	228	232	182	182	154	154	154	170	218	222	183	187	201	201	30	35.7405	-101.093	0.993	0.003	0.004
HT02	Hueco Tanks SP	166	174	206	208	223	231	232	240	182	186	154	188	134	134	202	210	147	180	185	261	19	31.9251	-106.042	0.0148	0.9822	0.003
HT03	Hueco Tanks SP	156	186	208	216	219	251	224	236	170	178	154	154	150	150	202	210	147	187	185	233	19	31.9251	-106.042	0.009	0.9848	0.0062
HT04	Hueco Tanks SP	168	186	216	228	219	219	224	236	170	186	152	154	134	150	206	210	163	183	185	264	19	31.9251	-106.042	0.009	0.9702	0.0208
HT05	Hueco Tanks SP	152	170	206	212	215	223	244	252	186	194	154	174	134	134	194	206	176	176	228	257	19	31.9251	-106.042	0.0122	0.9737	0.0141
HT06	Hueco Tanks SP	158	178	208	212	223	223	240	252	186	190	184	188	134	134	190	202	147	180	189	257	19	31.9251	-106.042	0.012	0.9842	0.0038
HT07	Hueco Tanks SP	168	170	200	206	219	223	244	244	186	194	148	154	134	150	214	214	170	180	225	257	19	31.9251	-106.042	0.0098	0.9542	0.036
HT08	Hueco Tanks SP	156	183	187	208	219	223	228	248	174	178	152	154	134	150	202	202	167	180	185	233	19	31.9251	-106.042	0.0206	0.9486	0.0308
HTo01	Hueco Tanks SP	168	170	200	226	219	223	244	248	174	174	154	170	134	134	210	218	167	170	185	261	20	31.9226	-106.041	0.0338	0.9553	0.0109
HTo02	Hueco Tanks SP	168	176	183	190	219	219	240	244	174	174	160	162	134	150	198	198	176	180	185	261	19	31.9264	-106.042	0.015	0.978	0.007
HTo03	Hueco Tanks SP	166	174	208	244	219	223	232	236	186	218	154	160	134	134	194	202	180	180	185	269	20	31.9245	-106.04	0.0088	0.9882	0.003
HTo04	Hueco Tanks SP	152	152	187	208	219	219	236	236	174	178	152	152	150	150	186	198	170	176	185	249	20	31.9245	-106.04	0.012	0.9519	0.0361
HTo05	Hueco Tanks SP	174	174	190	190	223	235	228	232	170	174	154	160	134	150	194	198	167	180	185	189	20	31.9264	-106.042	0.048	0.9281	0.0239
DW01	Matador WMA	156	160	183	212	219	223	224	236	174	198	150	154	154	154	234	238	172	172	197	209	28	34.0105	-100.187	0.9352	0.005	0.0598
DW02	Matador WMA	166	166	171	190	215	219	224	224	174	186	174	182	154	158	218	218	155	172	197	201	32	34.0051	-100.183	0.9853	0.003	0.0117
DW03	Matador WMA	166	182	171	212	215	227	220	240	182	190	142	154	142	154	214	214	176	187	201	201	28	34.0051	-100.183	0.988	0.003	0.009
DW04	Matador WMA	156	166	171	171	215	227	232	236	174	190	158	176	150	162	214	222	172	172	201	205	28	34.0209	-100.184	0.9764	0.002	0.0216
DW05	Matador WMA	160	170	190	204	207	219	236	240	182	198	146	178	142	158	222	246	167	172	197	253	30	34.021	-100.183	0.8564	0.004	0.1396
DW06	Matador WMA	156	156	196	204	215	219	224	236	174	186	174	178	146	162	222	226	183	199	257	264	91	34.0218	-100.185	0.8083	0.0173	0.1744
F01	Matador WMA	160	166	179	206	215	227	232	236	174	194	138	162	146	158	198	214	155	187	201	201	46	34.305	-100.497	0.976	0.0072	0.0168
MA001	Matador WMA	160	170	187	220	215	215	224	224	174	186	140	140	150	154	210	254	159	183	201	229	28	34.1136	-100.36	0.7628	0.0041	0.2331
MA002	Matador WMA	148	156	171	187	203	215	220	240	162	182	158	180	142	142	198	230	176	180	201	201	47	34.1073	-100.35	0.985	0.002	0.013
MA003	Matador WMA	144	160	183	187	219	219	220	244	182	186	150	174	150	150	198	206	172	183	264	269	46	34.1112	-100.357	0.6987	0.0494	0.2519
MA004	Matador WMA	144	160	171	216	199	223	224	224	190	198	154	174	146	154	242	266	155	155	201	257	46	34.115	-100.397	0.992	0.004	0.004
MA005	Matador WMA	156	166	190	208	199	227	224	224	178	186	170	204	154	158	198	212	167	183	201	201	46	34.1119	-100.357	0.9928	0.0032	0.004
MA006	Matador WMA	160	174	183	187	203	219	224	228	170	186	154	166	142	154	218	262	183	187	249	269	46	34.1123	-100.357	0.9537	0.0083	0.038
MA007	Matador WMA	144	170	196	220	219	223	224	236	190	198	158	178	146	154	198	202	167	172	201	201	46	34.1293	-100.353	0.993	0.003	0.004
MA008	Matador WMA	156	182	171	194	219	227	224	252	182	186	140	154	142	154	198	230	155	172	201	257	47	34.1075	-100.342	0.9794	0.0166	0.004
MA009	Matador WMA	148	166	187	194	207	219	220	236	174	190	150	176	146	146	198	202	167	172	201	245	47	34.1074	-100.349	0.6735	0.0119	0.3146
MA010	Matador WMA	144	170	196	200	207	211	228	240	182	182	154	206	142	162	222	226	167	176	201	201	46	34.1036	-100.35	0.9892	0.002	0.0088
MA011	Matador WMA	156	160	190	194	199	223	228	232	174	178	158	174	158	162	210	222	155	155	201	257	47	34.1085	-100.335	0.9894	0.003	0.0076
MA012	Matador WMA	144	152	171	171	227	227	232	236	178	182	158	190	142	158	202	222	176	176	201	261	28	34.1036	-100.347	0.993	0.003	0.004
MA013	Matador WMA	152	160	171	196	203	219	224	228	166	190	138	176	154	158	198	266	167	176	201	201	46	34.1074	-100.35	0.982	0.005	0.013
MA014	Matador WMA	156	160	171	187	199	207	220	224	174	186	150	158	142	158	202	212	167	187	197	201	65	34.1073	-100.355	0.9839	0.002	0.0141
MA015	Matador WMA	166	174	196	216	223	235	220	236	186	194	178	184	142	154	214	218	163	172	201	209	46	34.132	-100.439	0.9201	0.004	0.0759
MA016	Matador WMA	156	160	171	204	199	219	224	232	170	178	140	150	154	154	206	262	180	183	201	205	28	34.1275	-100.497	0.9854	0.003	0.0116
MA017	Matador WMA	148	156	175	208	199	215	236	244	190	198	154	168	142	154	210	254	165	167	197	201	46	34.1275	-100.501	0.9881	0.007	0.0049
MA018	Matador WMA	144	160	183	194	199	223	224	236	162	174	154	164	150	150	198	250	176	180	249	269	28	34.1112	-100.355	0.9323	0.0496	0.0181
MA019	Matador WMA	160	182	194	208	207	227	220	244	178	182	140	178	146	158	198	202	191	191	197	201	46	34.1076	-100.336	0.9903	0.004	0.0057
MA020	Matador WMA	156	160	171	194	223	227	224	232	178	186	154	158	142	158	222	230	155	172	253	257	47	34.1075	-100.339	0.9876	0.004	0.0084
MA021	Matador WMA	144	182	171	194	215	227	228	236	198	218	142	188	158	158	198	246	176	180	197	201	28	34.1075	-100.342	0.9857	0.0103	0.004
MA022	Matador WMA	160	170	190	204	215	227	224	232	170	190	158	190	154	158	198	206	167	180	197	201	46	34.1074	-100.354	0.9788	0.004	0.0172
MA023	Matador WMA	160	160	190	190	215	227	228	240	182	190	154	178	142	170	206	206	167	176	201	201	28	34.1086	-100.357	0.9827	0.0027	0.0146
MA026	Matador WMA	166	170	198	208	199	199	236	240	194	194	170	176	158	162	202	234	183	191	201	245	46	34.1321	-100.444	0.99	0.006	0.004
MA027	Matador WMA	144	166	204	208	199	227	236	244	178	182	134	158	142	174	198	218	180	183	201	209	46	34.1277	-100.378	0.9539	0.008	0.0381
MA028	Matador WMA	144	166	171	200	199	199	236	236	178	202	140	188	142	158	198	222	176	183	217	253	47	34.1645	-100.409	0.992	0.004	0.004
MA029	Matador WMA	170	174	204	212	215	219	228	240	178	186	184	212	154	158	198	258	180	183	201	261	47	34.1641	-100.4	0.9889	0.0081	0.003
MA030	Matador WMA	144	152	187	194	199	215	236	240	170	190	156	166	142	154	202	202	180	183	201	261	67	34.1549	-100.364	0.991	0.004	0.005
MA031	Matador WMA	160	160	190	212	219	223	224	236	190	190	150	158	158	166	198	230	180	183	201	201	46	34.1112	-100.35	0.993	0.004	0.003
MA032	Matador WMA	152	174	187	200	215	219	220	236	182	198	150	182	150	158	198	222	167	167	245	261	46	34.1074	-100.348	0.8396	0.0436	0.1168
MA033	Matador WMA	160	170	175	204	211	227	232	232	174	190	154	154	142	154	250	258	172	180	201	219	30	34.1051	-100.348	0.9795	0.0037	0.0168
MA034	Matador WMA	156	156	196	204	207	223	224	240	178	186	140	176	142	154	202	214	172	187	201	201	91	34.1179	-100.355	0.9853	0.002	0.0127
MA035	Matador WMA	166	174	204	208	199	235	228	240	174	198	150	150	146	158	198	222	172	176	205	217	46	34.118	-100.35	0.9885	0.002	0.0095
MA036	Matador WMA	160	170	187	187	219	223	232	236	174	202	140	174	142	154	226	230	176	191	201	201	46	34.1503	-100.477	0.9874	0.003	0.0096
MA037	Matador WMA	160	166	194	208	211	219	224	232	162	204	150	150	158	166	210	242	180	180	201	201	28	34.1335	-100.513	0.9648	0.0139	0.0213
MA038	Matador WMA	152	166	190	190	219	223	232	244	178	178	150	204	142	154	218	258	172	180	201	253	40	34.1307	-100.514	0.9185	0.005	0.0765
MA039	Matador WMA	144	174	171	190	219	235	228	236	174	174	182	192	150	158	226	246	167	180	197	201	46	34.1098	-100.48	0.9791	0.006	0.0149
MA040	Matador WMA	156	170	187	210	199	219	236	252	190	212	138	170	158	162	226	246	165	180	197	245	43	34.1157	-100.466	0.783	0.1978	0.0192
MA041	Matador WMA	156	156	196	198	215	227	220	224	186	198	158	184	142	150	234	266	167	172	197	201	28	34.1133	-100.341	0.9805	0.003	0.0165
MA042	Matador WMA	166	182	200	202	199	235	236	236	166	170	150	154	150	158	228	262	176	183	201	201	46	34.1114	-100.337	0.9684	0.0134	0.0182
MA043	Matador WMA	156	194	175	190	219	223	228	236	166	174	154	190	142	142	198	198	172	180	201	201	46	34.1036	-100.339	0.9611	0.0154	0.0235
MA044	Matador WMA	144	156	194	208	227	227	240	244	182	186	172	190	142	154	198	230	172	176	201	237	46	34.1035	-100.355	0.9701	0.005	0.0249
MA045	Matador WMA	166	170	183	198	199	199	232	240	178	212	152	158	150	154	198	246	155	172	197	249	28	34.1074	-100.349	0.9773	0.0098	0.0129
MA046	Matador WMA	156	160	187	187	215	215	224	240	178	186	142	150	154	154	198	202	172	191	201	201	46	34.1036	-100.341	0.988	0.002	0.01
MA047	Matador WMA	160	170	171	190	199	207	224	244	174	212	158	170	142	158	202	246	167	172	201	201	90	34.1126	-100.337	0.9909	0.0042	0.0049
MA048	Matador WMA	144	160	171	208	199	223	224	228	182	186	188	194	150	150	198	218	172	191	249	257	46	34.1131	-100.357	0.987	0.007	0.006
MA049	Matador WMA	160	160	171	187	215	227	224	240	162	182	142	190	150	154	198	222	172	176	201	257	28	34.1035	-100.346	0.9666	0.0029	0.0305
MA050	Matador WMA	144	152	206	208	219	227	224	232	182	186	180	184	142	146	198	198	176	178	201	201	89	34.1112	-100.354	0.9748	0.0202	0.005
MIHL01	Matagorda Island WMA	138	140	200	204	219	219	232	236	178	178	150	176	142	150	206	222	172	180	221	225	21	28.1031	-96.8236	0.009	0.004	0.987
MIHL03	Matagorda Island WMA	138	156	208	208	223	223	232	232	170	174	174	174	142	146	206	214	180	180	233	237	21	28.09	-96.8297	0.008	0.003	0.989
MIHL05	Matagorda Island WMA	140	156	200	208	215	215	232	236	182	182	176	180	142	146	206	218	172	176	221	273	21	28.1068	-96.819	0.0187	0.0048	0.9765
MIHL07	Matagorda Island WMA	140	174	190	216	227	227	232	240	178	190	130	130	142	142	218	218	167	172	229	273	21	28.2767	-96.557	0.0129	0.002	0.9851
MIHL08	Matagorda Island WMA	140	160	194	196	195	227	232	232	174	178	174	176	146	146	0	0	172	180	229	229	21	28.0814	-96.8358	0.013	0.002	0.985
MIHL09	Matagorda Island WMA	140	160	192	192	215	227	232	236	202	202	176	184	142	142	222	226	163	167	221	228	21	28.29	-96.5264	0.0145	0.0041	0.9814
MIHL11	Matagorda Island WMA	156	160	200	208	219	227	232	240	170	174	174	176	142	142	206	218	176	180	233	253	21	28.092	-96.8289	0.0224	0.004	0.9736
MIHL12	Matagorda Island WMA	140	156	187	200	223	223	236	236	170	174	130	172	142	154	214	214	176	176	221	277	21	28.0898	-96.8297	0.0143	0.005	0.9807
MIHL13	Matagorda Island WMA	138	152	200	204	219	223	236	236	166	182	170	192	142	146	206	206	172	180	229	277	21	28.1056	-96.8214	0.0366	0.0112	0.9522
MIHL14	Matagorda Island WMA	138	156	183	196	215	215	232	236	178	182	130	192	150	154	206	206	172	180	245	257	21	28.1153	-96.8033	0.011	0.002	0.987
MIHL15	Matagorda Island WMA	138	140	192	216	227	227	216	232	170	174	150	174	142	142	226	226	163	180	273	273	21	28.2816	-96.5436	0.0068	0.002	0.9912
MIHL16	Matagorda Island WMA	138	138	192	216	227	227	232	232	166	186	176	176	142	142	226	242	167	180	229	277	21	28.3305	-96.4402	0.012	0.0031	0.9849
MIHL17	Matagorda Island WMA	140	174	192	192	227	227	228	228	174	190	174	184	154	154	226	246	167	167	221	221	21	28.3252	-96.4583	0.015	0.003	0.982
MIHL18	Matagorda Island WMA	140	160	190	216	227	227	228	232	174	186	138	184	142	154	210	226	167	183	221	245	21	28.3235	-96.4595	0.0274	0.0025	0.9701
MIHL19	Matagorda Island WMA	174	174	192	192	227	227	232	236	170	194	130	186	142	142	226	230	180	183	221	229	21	28.2804	-96.5503	0.1471	0.0076	0.8453
MIHL20	Matagorda Island WMA	152	156	183	200	219	219	232	232	174	174	172	174	142	150	218	234	176	180	229	233	21	28.0941	-96.8282	0.0185	0.0117	0.9698
MIHL21	Matagorda Island WMA	138	156	187	208	219	223	232	236	174	174	174	174	146	150	206	238	176	180	229	229	21	28.1561	-96.7416	0.01	0.004	0.986
MIHL22	Matagorda Island WMA	138	140	200	200	219	227	216	240	170	178	150	184	146	154	214	222	172	180	229	277	21	28.2061	-96.6877	0.0089	0.003	0.9881
MIHL23	Matagorda Island WMA	138	140	187	187	219	219	232	236	170	202	150	184	142	146	206	214	180	180	253	273	21	28.1015	-96.8247	0.009	0.0059	0.9851
MIHL24	Matagorda Island WMA	152	156	204	204	215	223	232	236	174	202	174	174	146	150	206	238	176	180	253	277	21	28.0815	-96.8368	0.0208	0.0138	0.9654
MIHL25	Matagorda Island WMA	138	140	208	208	223	223	232	232	170	174	174	192	142	146	206	214	180	180	233	253	21	28.08	-96.8407	0.0088	0.003	0.9882
MIHL26	Matagorda Island WMA	156	156	204	208	215	219	232	236	174	174	130	174	150	150	206	234	176	183	253	277	21	28.0813	-96.835	0.0168	0.0101	0.9731
MIHL28	Matagorda Island WMA	138	140	187	216	215	215	220	228	170	194	138	198	142	142	214	226	183	187	233	273	21	28.3136	-96.4823	0.061	0.006	0.933
MIHL29	Matagorda Island WMA	138	138	192	208	219	223	232	236	170	174	176	192	146	150	206	214	172	180	221	269	21	28.0958	-96.8275	0.008	0.004	0.988
MIHL30	Matagorda Island WMA	138	156	187	192	215	215	232	232	170	178	130	174	150	154	214	214	163	180	229	245	21	28.2232	-96.6609	0.006	0.002	0.992
MIHL31	Matagorda Island WMA	140	174	192	192	223	231	216	244	170	190	156	178	142	154	218	226	163	167	221	277	21	28.3268	-96.468	0.0186	0.006	0.9754
MIHL32	Matagorda Island WMA	138	138	192	208	227	227	216	240	186	190	138	190	142	154	214	242	180	180	221	229	21	28.2795	-96.5516	0.0289	0.004	0.9671
MIHL33	Matagorda Island WMA	138	174	192	192	227	227	228	228	170	182	156	156	142	142	214	226	163	167	273	273	21	28.3254	-96.4407	0.01	0.0022	0.9878
MIHL34	Matagorda Island WMA	156	160	183	183	223	223	236	236	174	174	176	182	142	146	214	222	172	180	221	229	21	28.1345	-96.7751	0.0199	0.002	0.9781
MIHL35	Matagorda Island WMA	140	156	200	200	219	227	232	236	178	182	130	130	146	150	208	214	172	180	221	229	21	28.1075	-96.8172	0.007	0.003	0.99
BL1	Midland Co.	170	178	175	208	191	231	240	244	170	174	178	190	142	154	202	206	172	176	201	201	46	32.0047	-102.892	0.979	0.012	0.009
BL1_2009	Midland Co.	148	170	171	171	191	199	236	240	198	206	154	222	154	170	198	198	180	180	201	201	88	31.9605	-102.109	0.9887	0.0093	0.002
BL2	Midland Co.	160	166	171	202	219	227	232	232	174	190	140	172	146	154	198	198	167	167	201	201	46	31.9124	-102.07	0.9906	0.0032	0.0062
BL3	Midland Co.	160	166	171	187	219	231	228	236	174	198	140	154	146	154	214	230	172	183	201	201	46	31.9086	-102.831	0.9909	0.003	0.0061
BL4	Midland Co.	144	190	171	175	219	231	236	240	170	186	140	172	142	142	202	228	176	183	201	201	46	32.017	-101.855	0.99	0.004	0.006
JLB02	Midland Co.	156	160	187	212	191	215	236	240	182	194	152	212	150	162	196	218	183	187	201	217	46	32.0055	-101.987	0.9171	0.0537	0.0292
JLB03	Midland Co.	152	166	171	190	231	239	236	244	178	186	140	142	150	150	198	242	187	187	197	201	46	32.0073	-102.021	0.9807	0.013	0.0063
JLB04	Midland Co.	160	170	171	216	207	207	236	244	210	210	150	184	142	150	198	206	165	176	213	217	46	31.921	-101.985	0.94	0.0093	0.0507
JPB01	Midland Co.	144	174	171	187	199	219	232	236	170	190	142	194	142	142	198	238	172	172	201	205	32	34.9768	-100.784	0.9912	0.002	0.0068
KL1	Midland Co.	144	160	190	208	227	235	232	232	186	194	140	152	154	162	210	250	176	199	201	205	46	32.0086	-102.274	0.9867	0.0073	0.006
KL2	Midland Co.	144	144	208	208	199	231	232	240	182	206	156	198	154	158	202	230	176	187	197	201	46	32.0095	-101.985	0.994	0.003	0.003
KL2	Midland Co.	166	166	171	179	199	227	232	236	170	186	160	186	142	166	198	222	180	183	201	205	46	32.036	-102.28	0.9864	0.004	0.0096
KL3	Midland Co.	156	182	196	212	211	215	220	232	174	182	150	162	162	166	234	234	155	183	201	213	46	31.8259	-101.809	0.9879	0.004	0.0081
KL5	Midland Co.	170	174	171	187	199	227	224	232	186	198	140	154	142	154	198	246	172	176	225	261	46	31.8931	-102.328	0.9702	0.01	0.0198
m	Midland Co.	144	170	171	200	219	235	216	248	182	198	158	158	154	158	198	198	180	183	201	201	46	32.0015	-102.14	0.9926	0.0034	0.004
M1	Midland Co.	148	166	190	194	191	215	216	232	158	202	144	158	142	142	198	212	167	167	201	217	46	32.0353	-102.066	0.9704	0.0052	0.0244
M2	Midland Co.	148	166	190	194	191	235	232	236	190	194	200	214	142	142	198	218	167	183	201	217	46	32.0353	-102.066	0.9838	0.0111	0.0051
NM827C	Midland Co.	152	166	190	190	199	239	236	240	166	190	162	208	150	158	198	218	155	180	201	217	9	31.888	-102.208	0.99	0.004	0.006
RL_HT_2	Midland Co.	144	160	171	190	211	219	240	248	182	182	140	160	142	158	202	250	183	191	217	273	46	32.0098	-102.27	0.9665	0.0235	0.01
RL_HT_3	Midland Co.	144	166	187	198	219	223	232	232	178	198	180	188	142	146	198	230	180	183	201	201	46	32.0098	-102.27	0.9919	0.003	0.0051
RL_HT_4	Midland Co.	160	160	202	212	199	199	236	240	162	194	158	172	142	158	198	214	167	180	201	209	46	32.0481	-102.081	0.989	0.004	0.007
RL_HT_6	Midland Co.	152	174	196	202	215	231	236	248	182	194	168	194	142	158	210	226	165	176	201	201	46	32.0034	-102.14	0.9883	0.0077	0.004
RL_HT_7	Midland Co.	160	166	187	204	211	215	232	232	170	178	162	182	154	154	198	226	176	180	205	209	46	32.004	-102.141	0.9059	0.004	0.0901
RL_HT_8	Midland Co.	148	160	187	190	219	223	240	244	182	182	156	190	142	158	226	230	165	183	201	209	46	32.003	-102.139	0.9871	0.0069	0.006
RL05	Midland Co.	144	170	171	179	223	223	236	244	190	194	180	204	146	162	202	218	187	199	201	201	9	31.9179	-101.977	0.9901	0.0054	0.0045
RL06	Midland Co.	144	170	171	190	215	223	228	244	182	202	160	172	162	162	230	230	167	172	201	249	46	32.0159	-102.186	0.9911	0.0051	0.0038
RL07	Midland Co.	144	148	171	175	223	231	232	248	182	190	154	160	142	162	198	218	172	187	201	213	46	32.0015	-102.14	0.9876	0.0081	0.0043
RL08	Midland Co.	152	160	171	179	199	199	240	248	174	182	142	150	150	158	230	230	180	183	201	217	46	32.0015	-102.14	0.9879	0.003	0.0091
SE1	Midland Co.	156	170	179	202	199	235	232	244	198	198	158	226	146	154	198	198	165	172	201	201	46	32.0015	-102.14	0.992	0.004	0.004
SLL01	Midland Co.	144	144	204	212	215	219	240	240	182	182	140	150	150	154	198	226	176	180	217	217	46	32.0309	-101.873	0.9913	0.003	0.0057
MM06	Mitchell Co.	156	160	198	216	227	231	228	248	178	190	158	160	142	142	198	218	167	172	201	205	46	32.445	-100.993	0.9874	0.003	0.0096
MM08	Mitchell Co.	160	170	190	194	215	227	232	240	174	174	158	160	142	150	198	218	172	187	205	251	46	32.445	-100.993	0.96	0.0067	0.0333
MM10	Mitchell Co.	156	166	171	183	199	223	232	248	178	178	150	160	142	158	198	198	167	176	205	273	38	32.445	-100.993	0.9186	0.0196	0.0618
MM13	Mitchell Co.	148	174	187	187	227	227	236	240	186	206	168	208	154	158	242	242	172	172	201	205	28	32.445	-100.993	0.993	0.003	0.004
MM14	Mitchell Co.	148	174	194	202	199	219	236	236	174	178	152	154	142	150	206	218	180	183	205	217	28	32.445	-100.993	0.9442	0.0295	0.0263
MM15	Mitchell Co.	160	170	190	198	215	215	228	248	178	186	196	198	158	158	206	210	163	176	201	217	46	32.445	-100.993	0.99	0.004	0.006
MM16	Mitchell Co.	144	170	192	204	199	215	236	244	186	186	146	168	154	154	202	206	172	180	201	217	46	32.445	-100.993	0.9653	0.005	0.0297
MM17	Mitchell Co.	144	148	187	190	223	223	224	236	162	202	140	194	154	154	198	218	180	183	205	217	46	32.445	-100.993	0.9909	0.003	0.0061
MM18	Mitchell Co.	148	174	194	198	199	219	232	240	190	194	140	192	158	166	194	198	167	183	201	217	46	32.445	-100.993	0.9737	0.0213	0.005
MM19	Mitchell Co.	144	144	171	208	199	227	236	244	162	190	176	198	142	158	198	218	170	176	201	201	46	32.445	-100.993	0.9868	0.0092	0.004
mm22	Mitchell Co.	144	148	190	192	199	231	220	240	186	190	144	184	158	162	198	210	172	191	201	264	11	32.445	-100.993	0.9772	0.005	0.0178
mm24	Mitchell Co.	148	160	171	190	215	223	236	236	162	174	164	186	154	158	206	214	167	167	205	217	68	32.445	-100.993	0.9689	0.003	0.0281
mm25	Mitchell Co.	148	186	171	171	0	0	240	240	174	182	150	180	146	158	0	0	176	176	201	201	11	32.445	-100.993	0.99	0.005	0.005
SA1	Mitchell Co.	144	170	171	196	199	219	232	244	178	186	150	174	142	158	198	214	183	191	201	257	28	32.4277	-100.907	0.9903	0.0045	0.0052
KK117	RPQRR	156	166	204	220	199	215	236	240	190	194	140	182	154	162	222	234	180	183	201	261	22	32.7288	-100.569	0.994	0.003	0.003
KK118	RPQRR	144	156	194	198	227	231	236	240	174	182	154	188	142	154	202	222	172	176	201	201	46	32.6833	-100.56	0.9928	0.003	0.0042
KK119	RPQRR	166	166	171	175	219	223	236	236	178	178	140	158	146	162	202	222	183	191	201	257	46	32.7189	-100.548	0.9895	0.0042	0.0063
KK120	RPQRR	144	160	183	216	215	215	224	228	166	170	140	174	146	158	198	214	167	187	201	209	46	32.7056	-100.545	0.9256	0.004	0.0704
KK121	RPQRR	170	182	171	200	207	231	232	236	170	170	140	156	142	158	198	214	155	183	201	205	46	32.7071	-100.546	0.984	0.005	0.011
KK122	RPQRR	166	166	171	171	199	219	236	240	178	182	156	170	142	158	202	222	155	187	201	205	28	32.7227	-100.557	0.9943	0.0027	0.003
KK123	RPQRR	160	170	175	226	215	231	228	240	182	186	154	182	154	158	206	230	170	180	201	201	40	32.7307	-100.559	0.9193	0.0767	0.004
KK124	RPQRR	144	166	171	171	215	215	232	236	166	174	174	182	142	154	206	238	155	176	197	201	46	32.7364	-100.561	0.9861	0.002	0.0119
KK125	RPQRR	160	160	190	194	215	259	228	240	170	194	146	180	142	154	208	230	187	191	201	217	46	32.7366	-100.561	0.982	0.004	0.014
KK126	RPQRR	152	160	194	220	223	227	236	244	186	190	148	190	142	150	214	222	167	183	201	201	46	32.7225	-100.558	0.9569	0.012	0.0311
KK127	RPQRR	160	166	171	171	199	223	220	236	166	178	180	192	142	142	198	234	167	187	201	257	46	32.7228	-100.559	0.9915	0.0022	0.0063
KK128	RPQRR	144	170	179	208	211	219	220	232	170	178	170	170	142	142	198	198	167	176	197	201	46	32.7277	-100.564	0.9778	0.003	0.0192
KK129	RPQRR	160	160	187	216	223	223	232	244	170	190	156	170	146	154	230	238	176	180	201	217	28	32.7277	-100.565	0.9633	0.004	0.0327
KK130	RPQRR	148	156	171	171	207	231	220	224	182	190	152	154	142	158	198	214	172	191	201	201	46	32.7186	-100.57	0.9883	0.0038	0.0079
KK131	RPQRR	0	0	198	220	195	215	224	232	182	182	174	176	142	162	214	230	176	180	201	209	46	32.7173	-100.572	0.9811	0.004	0.0149
KK132	RPQRR	144	160	179	194	211	211	232	248	170	210	154	196	154	158	202	238	172	191	197	205	38	32.7089	-100.567	0.9832	0.003	0.0138
KK133	RPQRR	152	170	202	208	211	223	228	232	174	182	148	188	154	158	198	212	172	183	201	253	43	32.7084	-100.566	0.9672	0.007	0.0258
KK134	RPQRR	160	160	183	187	215	231	240	240	178	178	144	152	154	154	198	214	155	172	205	219	46	32.707	-100.565	0.9482	0.002	0.0498
KK135	RPQRR	166	174	208	220	203	219	220	232	166	174	140	176	154	154	222	238	167	176	201	261	46	32.7066	-100.56	0.9699	0.0049	0.0252
KK136	RPQRR	160	170	204	220	199	223	224	236	182	206	156	190	150	154	210	218	163	176	201	217	46	32.7066	-100.559	0.9894	0.003	0.0076
KK137	RPQRR	166	186	187	200	219	219	220	236	166	186	142	166	158	158	226	230	163	180	201	261	46	32.7001	-100.552	0.9437	0.0422	0.0141
KK138	RPQRR	170	174	194	212	223	223	236	240	182	190	156	158	142	154	190	198	176	183	201	205	46	32.6998	-100.553	0.9842	0.0118	0.004
KK139	RPQRR	144	156	190	208	195	199	236	240	174	190	170	186	154	158	202	214	176	191	201	205	46	32.6956	-100.558	0.9931	0.002	0.0049
KK140	RPQRR	166	178	171	179	199	215	220	240	182	190	144	154	142	154	190	230	174	176	201	221	46	32.694	-100.557	0.9279	0.0172	0.0549
KK142	RPQRR	166	166	194	194	199	223	228	240	178	202	158	174	142	154	198	222	167	176	201	201	46	32.7092	-100.546	0.9901	0.0039	0.006
KK143	RPQRR	166	170	171	187	211	231	240	240	174	178	160	164	142	158	198	222	172	176	201	213	46	32.7352	-100.56	0.9851	0.006	0.0089
KK144	RPQRR	166	166	171	220	195	251	232	236	178	178	140	190	142	142	198	218	176	180	201	217	40	32.7323	-100.568	0.9769	0.0172	0.0059
RP01	RPQRR	144	156	171	212	199	231	224	244	182	182	160	196	154	158	194	210	163	172	201	261	28	32.7372	-100.572	0.963	0.0302	0.0068
RP02	RPQRR	160	170	190	194	231	235	228	240	178	182	156	184	154	158	198	222	167	176	201	217	2	32.7372	-100.572	0.992	0.003	0.005
RP03	RPQRR	160	166	171	196	211	211	232	240	178	198	146	212	146	146	202	218	172	180	201	269	43	32.7372	-100.572	0.9577	0.002	0.0403
RP04	RPQRR	156	160	167	171	211	227	224	248	182	198	140	190	150	154	222	222	172	183	197	261	46	32.7372	-100.572	0.9892	0.003	0.0078
RP05	RPQRR	144	152	190	190	199	211	228	232	170	182	172	174	142	158	214	218	167	172	253	261	46	32.7372	-100.572	0.8745	0.004	0.1215
RP06	RPQRR	144	166	190	196	199	207	240	244	174	182	140	172	142	154	218	230	180	180	201	201	46	32.7372	-100.572	0.992	0.0028	0.0052
RP12	RPQRR	160	170	171	194	207	215	224	236	170	182	174	188	154	154	222	222	163	180	201	217	28	32.7372	-100.572	0.9671	0.003	0.0299
RP19	RPQRR	144	152	190	200	199	215	236	236	166	210	188	196	150	154	220	222	163	172	201	201	40	32.7372	-100.572	0.9861	0.003	0.0109
RP20	RPQRR	156	156	171	200	199	211	216	236	174	182	146	172	142	154	226	238	155	172	217	261	46	32.7372	-100.572	0.9705	0.002	0.0275
RP30	RPQRR	160	166	198	208	219	219	216	236	174	178	148	168	142	154	210	218	155	180	197	201	40	32.7372	-100.572	0.9044	0.0097	0.0859
RP31	RPQRR	144	144	187	190	195	207	236	240	178	182	140	164	150	154	202	210	176	180	201	217	46	32.7372	-100.572	0.988	0.003	0.009
RP32	RPQRR	144	144	183	196	203	219	236	236	178	182	160	160	142	154	214	226	172	176	201	233	46	32.7372	-100.572	0.6408	0.008	0.3512
RP34	RPQRR	166	166	171	194	215	215	220	244	174	202	178	180	154	158	218	222	155	176	201	249	46	32.7372	-100.572	0.9893	0.004	0.0067
RP35	RPQRR	166	186	183	187	215	219	216	240	174	182	140	164	158	162	198	226	172	176	201	201	46	32.7372	-100.572	0.9813	0.0056	0.0131
RP36	RPQRR	174	182	171	200	211	231	220	240	182	186	146	148	150	154	198	254	176	176	197	201	46	32.7372	-100.572	0.9685	0.0103	0.0212
RP37	RPQRR	144	174	171	187	207	215	216	232	174	190	160	176	154	154	198	210	172	172	201	253	46	32.7372	-100.572	0.9073	0.003	0.0897
RP38	RPQRR	144	156	171	187	211	223	232	240	174	182	188	190	142	150	222	226	167	172	201	201	46	32.7372	-100.572	0.9691	0.002	0.0289
RP39	RPQRR	156	160	171	171	219	227	232	240	182	202	154	184	150	162	210	222	172	180	201	201	46	32.7372	-100.572	0.986	0.006	0.008
RP40	RPQRR	160	166	179	190	227	227	232	244	158	178	140	174	154	162	226	230	176	187	201	201	46	32.7372	-100.572	0.9898	0.003	0.0072
RP41	RPQRR	156	166	183	192	215	219	236	240	170	174	154	174	142	158	194	222	161	172	201	264	46	32.7372	-100.572	0.037	0.009	0.954
RP43	RPQRR	160	166	171	171	199	215	236	240	182	194	174	188	142	162	214	220	183	187	217	217	40	32.7372	-100.572	0.994	0.002	0.004
RP44	RPQRR	138	148	171	175	199	215	232	240	162	174	174	176	142	142	214	230	176	183	201	253	46	32.7372	-100.572	0.7747	0.002	0.2233
RP45	RPQRR	160	186	171	220	199	215	216	224	182	198	150	174	142	154	198	202	176	187	201	253	46	32.7372	-100.572	0.989	0.003	0.008
RP46	RPQRR	160	160	194	208	199	199	220	240	170	186	160	168	142	142	210	214	172	187	201	201	46	32.7372	-100.572	0.9885	0.0034	0.0081
RP47	RPQRR	156	166	183	192	199	235	232	240	174	178	140	174	154	154	202	222	161	172	201	217	46	32.7372	-100.572	0.7697	0.002	0.2283
RP48	RPQRR	160	170	198	220	219	223	232	236	174	190	146	146	150	162	198	202	155	161	201	201	46	32.7372	-100.572	0.9769	0.004	0.0191
RP49	RPQRR	148	166	171	183	199	211	232	232	174	202	140	154	142	162	218	218	155	165	197	201	46	32.7372	-100.572	0.989	0.003	0.008
RP50	RPQRR	144	166	200	208	199	207	232	244	174	190	140	154	154	158	210	218	176	183	201	205	46	32.7372	-100.572	0.9879	0.0056	0.0065
RP51	RPQRR	144	156	171	175	211	219	232	240	174	190	140	156	142	158	206	242	165	176	201	217	2	32.7372	-100.572	0.9883	0.003	0.0087
RP52	RPQRR	156	170	171	190	199	211	232	240	182	206	168	174	146	158	198	230	176	180	201	205	40	32.7372	-100.572	0.9913	0.0027	0.006
RP53	RPQRR	160	166	171	183	227	231	232	232	190	204	144	158	146	154	198	222	172	180	197	217	46	32.7372	-100.572	0.9744	0.003	0.0226
RP54	RPQRR	144	166	175	179	207	223	232	240	170	186	154	154	146	150	226	226	172	187	201	201	40	32.7372	-100.572	0.858	0.005	0.137
RP55	RPQRR	152	166	171	190	199	199	236	236	166	182	180	188	150	154	198	222	155	183	201	219	40	32.7372	-100.572	0.9905	0.0035	0.006
RP56	RPQRR	144	152	204	220	195	211	232	236	182	202	154	174	154	158	216	218	176	176	205	253	46	32.7372	-100.572	0.8687	0.006	0.1253
RP57	RPQRR	144	152	194	208	223	227	228	228	182	198	140	194	142	154	198	202	163	183	201	201	2	32.7372	-100.572	0.994	0.003	0.003
RP58	RPQRR	144	156	190	208	211	215	232	236	174	206	156	174	146	154	210	226	155	176	201	201	46	32.7372	-100.572	0.9684	0.002	0.0296
RP59	RPQRR	160	160	190	198	199	223	232	240	182	186	140	172	154	154	198	210	172	183	201	201	46	32.7372	-100.572	0.995	0.002	0.003
RP61	RPQRR	152	160	171	175	215	227	232	240	182	182	156	190	154	154	202	206	176	176	201	201	46	32.7372	-100.572	0.9881	0.002	0.0099
RP62	RPQRR	156	160	167	198	199	219	236	244	178	182	154	184	142	146	210	230	165	187	201	201	46	32.7372	-100.572	0.991	0.005	0.004
RP63	RPQRR	156	166	175	194	199	223	216	228	166	170	156	198	158	162	208	238	163	176	201	209	46	32.7372	-100.572	0.8306	0.0042	0.1651
RP64	RPQRR	160	174	179	183	211	215	232	236	174	194	154	174	154	154	214	250	180	180	201	213	46	32.7372	-100.572	0.5769	0.017	0.4061
RP65	RPQRR	160	166	171	194	219	223	232	236	162	166	172	182	158	162	218	218	155	165	205	233	46	32.7372	-100.572	0.9429	0.0074	0.0497
RP66	RPQRR	156	160	194	216	219	223	236	240	174	182	150	156	154	154	198	234	159	183	201	205	46	32.7372	-100.572	0.8792	0.0041	0.1167
RP67	RPQRR	160	166	198	200	199	223	232	236	174	174	138	164	142	154	230	254	176	187	201	253	46	32.7372	-100.572	0.989	0.003	0.008
RP68	RPQRR	144	152	187	200	219	227	232	236	182	190	140	176	154	162	202	218	155	163	201	257	46	32.7372	-100.572	0.986	0.006	0.008
RP69	RPQRR	156	166	171	175	207	223	220	236	182	186	138	140	146	154	214	222	167	180	201	217	46	32.7372	-100.572	0.8753	0.002	0.1227
RP70	RPQRR	160	166	179	216	219	219	228	232	194	202	144	184	154	158	198	218	167	183	219	253	46	32.7372	-100.572	0.8278	0.0224	0.1498
RP71	RPQRR	156	174	171	171	219	231	232	240	174	198	146	156	158	158	230	242	172	176	201	201	2	32.7372	-100.572	0.9929	0.003	0.0041
TJL1818(7)	RPQRR	160	174	171	194	215	215	228	232	174	190	150	180	142	150	210	220	176	183	201	205	46	32.7352	-100.578	0.9867	0.0033	0.01
TJL1819(8)	RPQRR	144	166	171	187	195	219	232	244	170	206	140	156	142	154	214	222	155	180	201	205	28	32.7352	-100.578	0.9849	0.003	0.0121
TJL1820(9)	RPQRR	144	160	171	187	211	215	228	240	174	182	148	198	154	154	206	222	180	191	201	201	28	32.7352	-100.578	0.978	0.0028	0.0192
BLOODSAMPLE1	RPQRR	152	156	226	228	227	227	232	244	174	182	144	164	142	158	198	254	176	183	201	217	46	32.7186	-100.57	0.8836	0.0822	0.0342
KK050	Seminole Canyon SP	160	178	187	204	219	275	248	248	204	214	160	184	154	166	196	206	167	183	213	213	59	29.6976	-101.321	0.3479	0.6166	0.0355
KK051	Seminole Canyon SP	144	174	187	190	211	231	232	244	154	198	142	156	154	158	202	258	176	187	201	263	64	29.6792	-101.316	0.9927	0.003	0.0043
KK052	Seminole Canyon SP	144	182	175	204	199	219	232	248	186	198	142	142	154	158	206	210	165	191	201	205	58	29.6977	-101.321	0.988	0.005	0.007
KK053	Seminole Canyon SP	160	190	175	190	219	291	228	248	182	218	152	172	154	166	198	246	176	191	201	201	59	29.6924	-101.319	0.9804	0.015	0.0046
KK054	Seminole Canyon SP	144	178	171	212	215	215	216	228	194	230	140	150	134	134	196	216	155	191	201	233	4	29.691	-101.319	0.5994	0.3594	0.0412
KK055	Seminole Canyon SP	138	148	175	187	219	227	216	216	174	174	140	188	154	158	186	214	176	191	201	201	64	29.6722	-101.32	0.4844	0.0061	0.5095
KK056	Seminole Canyon SP	148	178	194	208	203	231	228	228	186	194	146	160	154	162	190	234	180	187	201	209	31	29.6968	-101.32	0.7857	0.2053	0.009
KK057	Seminole Canyon SP	138	201	194	198	215	215	228	248	178	178	140	160	158	162	0	0	155	155	201	201	34	29.7036	-101.317	0.9727	0.007	0.0203
KK058	Seminole Canyon SP	166	178	194	208	199	215	216	228	166	182	150	152	134	166	216	222	155	176	201	201	32	29.6955	-101.319	0.8187	0.0521	0.1292
KK059	Seminole Canyon SP	148	170	183	183	215	223	232	236	190	206	152	154	158	162	210	258	176	187	201	233	59	29.6883	-101.321	0.8962	0.0406	0.0632
KK060	Seminole Canyon SP	148	190	171	208	219	231	232	232	190	206	142	156	158	162	206	206	180	187	201	201	64	29.6822	-101.322	0.9876	0.006	0.0064
SC001	Seminole Canyon SP	160	170	171	196	215	283	232	244	154	154	150	154	154	158	206	216	155	172	201	213	30	29.7008	-101.314	0.9721	0.0089	0.019
SC003	Seminole Canyon SP	152	178	194	196	199	215	232	232	166	174	156	184	162	166	216	234	183	183	209	217	59	29.705	-101.308	0.963	0.0041	0.0329
SC004	Seminole Canyon SP	144	166	184	204	215	291	228	232	204	222	160	180	142	166	214	222	167	183	201	201	34	29.6869	-101.318	0.9706	0.0216	0.0078
SC005	Seminole Canyon SP	160	160	171	179	199	231	236	248	166	204	154	160	154	158	206	222	155	183	201	205	59	29.6869	-101.318	0.9858	0.007	0.0072
SC006	Seminole Canyon SP	144	190	175	187	215	291	240	248	154	194	142	156	146	154	214	250	180	183	201	219	72	29.6869	-101.318	0.9843	0.0025	0.0132
SC007	Seminole Canyon SP	144	146	175	187	215	291	240	256	154	194	142	156	146	154	214	250	180	183	169	173	72	29.6869	-101.318	0.9181	0.0295	0.0524
LV01	Starr Co.	138	160	183	183	207	219	224	228	174	178	152	152	146	154	214	218	159	167	197	205	101	26.3539	-98.588	0.01	0.002	0.988
LV02	Starr Co.	138	156	171	212	207	207	244	244	182	186	154	192	150	158	222	236	147	172	209	217	100	26.5327	-98.5479	0.2672	0.2061	0.5267
LV03	Starr Co.	152	156	183	190	199	207	216	244	0	0	148	160	150	154	194	216	159	167	181	209	34	26.4496	-98.5627	0.0221	0.0128	0.9651
LV04	Starr Co.	166	174	187	187	191	207	232	240	162	190	150	160	146	150	190	226	167	176	217	237	76	26.601	-98.6862	0.0346	0.0541	0.9113
LV05	Starr Co.	156	160	179	187	211	223	240	240	166	182	154	156	150	150	194	194	176	180	197	201	102	26.4487	-98.563	0.0527	0.01	0.9373
LV06	Starr Co.	138	156	183	187	203	219	232	236	170	178	148	156	146	154	226	236	161	167	201	241	103	26.6367	-98.6442	0.0091	0.002	0.9889
LV07	Starr Co.	138	138	179	183	207	215	236	236	174	186	148	160	146	150	198	202	176	183	205	219	30	26.4494	-98.5629	0.1042	0.0214	0.8744
LV08	Starr Co.	140	152	190	192	219	223	220	232	186	186	148	148	150	154	206	210	176	183	189	213	101	26.6011	-98.6863	0.012	0.0152	0.9728
LV09	Starr Co.	138	166	183	187	207	215	232	236	162	174	152	192	150	154	206	210	167	167	201	237	59	26.6377	-98.6445	0.0102	0.002	0.9878
LV10	Starr Co.	138	138	175	192	219	219	232	232	182	186	148	192	150	150	206	218	159	176	209	209	8	26.6221	-98.6637	0.0078	0.0051	0.9871
KK010	Yoakum Dunes WMA	148	160	187	194	223	235	236	240	170	178	168	206	142	154	202	218	155	187	201	205	46	33.358	-102.621	0.994	0.002	0.004
KK011	Yoakum Dunes WMA	174	182	171	183	215	215	232	248	194	194	186	192	158	158	226	238	172	176	201	217	46	33.3434	-102.607	0.989	0.004	0.007
KK012	Yoakum Dunes WMA	152	160	190	208	195	227	220	236	178	198	158	184	158	158	214	230	167	180	201	205	46	33.3728	-102.63	0.9814	0.0033	0.0153
KK013	Yoakum Dunes WMA	152	174	194	202	223	231	236	236	178	182	144	196	154	162	198	234	167	180	201	209	46	33.3581	-102.632	0.9854	0.0096	0.005
KK014	Yoakum Dunes WMA	144	144	171	183	199	215	216	240	178	218	154	188	142	150	218	258	167	167	201	205	46	33.3434	-102.604	0.9748	0.004	0.0212
KK015	Yoakum Dunes WMA	160	170	187	190	215	227	240	248	174	186	172	180	142	162	198	198	167	183	197	205	46	33.358	-102.631	0.991	0.003	0.006
KK016	Yoakum Dunes WMA	144	144	171	179	219	227	232	232	190	194	140	182	154	154	218	222	187	187	201	201	46	33.3728	-102.622	0.993	0.002	0.005
KK017	Yoakum Dunes WMA	148	166	187	187	195	227	228	244	186	190	182	192	150	158	202	218	155	180	201	201	46	33.3728	-102.622	0.986	0.005	0.009
KK018	Yoakum Dunes WMA	160	160	171	202	223	235	228	240	174	198	144	176	142	162	198	230	180	191	201	201	46	33.3581	-102.635	0.995	0.002	0.003
KK019	Yoakum Dunes WMA	148	160	171	198	215	215	232	240	182	194	168	176	142	162	198	230	183	187	201	201	46	33.3581	-102.635	0.9954	0.002	0.0026
KK020	Yoakum Dunes WMA	144	170	171	204	227	235	216	228	190	198	152	182	142	162	214	234	155	167	201	201	46	33.3435	-102.588	0.9887	0.002	0.0093
KK021	Yoakum Dunes WMA	144	144	194	200	195	199	236	248	174	194	146	176	142	158	198	226	167	183	193	201	46	33.3728	-102.624	0.9858	0.007	0.0072
KK022	Yoakum Dunes WMA	166	178	171	200	215	227	244	244	174	182	140	178	142	146	198	202	167	176	201	201	46	33.3434	-102.608	0.9883	0.006	0.0057
KK023	Yoakum Dunes WMA	144	178	190	208	199	223	220	244	198	202	140	184	162	166	210	234	167	183	197	249	34	33.3728	-102.63	0.9899	0.0061	0.004
KK024	Yoakum Dunes WMA	144	160	216	242	199	199	244	244	174	182	162	168	154	154	230	234	155	178	201	201	46	33.3432	-102.596	0.9929	0.004	0.0031
KK025	Yoakum Dunes WMA	156	170	183	198	203	223	228	236	178	198	140	182	158	162	198	198	180	183	201	205	46	33.3581	-102.632	0.992	0.003	0.005
KK026	Yoakum Dunes WMA	140	144	171	200	199	231	224	232	186	186	150	194	142	154	198	198	155	187	201	201	46	33.3581	-102.636	0.9722	0.003	0.0248
KK028	Yoakum Dunes WMA	148	174	187	212	219	227	232	236	178	202	140	192	142	142	206	238	155	176	197	201	46	33.3725	-102.62	0.9852	0.005	0.0098
KK030	Yoakum Dunes WMA	144	182	171	198	219	227	228	240	178	190	140	140	154	154	198	198	172	195	201	201	46	33.358	-102.631	0.9945	0.0029	0.0026
KK031	Yoakum Dunes WMA	144	148	187	187	215	227	232	244	170	174	180	190	142	158	198	198	180	191	201	201	46	33.3727	-102.621	0.991	0.004	0.005
KK032	Yoakum Dunes WMA	148	166	187	187	199	207	228	232	178	190	140	180	150	158	214	218	180	180	201	205	46	33.3727	-102.622	0.9681	0.005	0.0269
KK033	Yoakum Dunes WMA	144	152	194	202	223	235	232	240	174	198	156	176	142	154	202	214	183	187	201	201	46	33.3682	-102.618	0.9927	0.0023	0.005
KK035	Yoakum Dunes WMA	144	166	171	208	215	227	224	232	170	198	140	182	142	162	198	202	176	183	201	209	46	33.3717	-102.617	0.993	0.003	0.004
KK038	Yoakum Dunes WMA	148	166	187	190	223	227	240	244	174	178	156	198	154	162	198	238	167	167	201	201	46	33.358	-102.625	0.9893	0.003	0.0077
KK039	Yoakum Dunes WMA	148	148	175	206	223	243	236	240	182	212	154	188	154	162	198	230	180	187	201	213	46	33.3434	-102.606	0.6105	0.3864	0.0031
KK040	Yoakum Dunes WMA	148	156	187	194	215	227	232	240	174	182	186	208	142	146	226	242	172	187	201	201	46	33.3433	-102.598	0.989	0.002	0.009
KK041	Yoakum Dunes WMA	144	160	183	194	223	235	220	232	190	190	156	184	154	166	198	198	167	172	217	217	30	33.3729	-102.616	0.991	0.002	0.007
KK042	Yoakum Dunes WMA	148	166	183	187	199	231	236	244	190	198	154	180	150	162	218	222	187	191	201	217	46	33.358	-102.634	0.9878	0.007	0.0052
KK043	Yoakum Dunes WMA	144	174	171	216	215	223	216	240	174	186	156	206	154	158	202	222	180	191	201	209	46	33.358	-102.634	0.9845	0.0035	0.012
KK044	Yoakum Dunes WMA	144	174	194	202	195	223	232	240	174	198	156	176	142	154	202	226	176	187	201	263	46	33.3682	-102.618	0.9924	0.0026	0.005
KK045	Yoakum Dunes WMA	148	152	200	202	223	235	236	240	186	190	182	194	154	170	202	214	176	191	201	263	46	33.3683	-102.618	0.994	0.003	0.003
KK046	Yoakum Dunes WMA	144	170	190	204	199	219	216	232	166	182	158	178	142	158	198	238	165	191	197	201	46	33.3434	-102.608	0.9896	0.0024	0.008
KK047	Yoakum Dunes WMA	137	170	175	187	211	215	216	232	182	190	188	192	142	142	218	234	165	195	201	201	46	33.3433	-102.592	0.9374	0.0022	0.0604
KK048	Yoakum Dunes WMA	144	156	216	242	199	227	232	232	166	174	180	200	154	158	202	230	176	195	201	201	46	33.3433	-102.596	0.9851	0.003	0.0119
KK049	Yoakum Dunes WMA	170	174	171	190	211	223	232	240	166	198	176	176	142	158	198	226	183	191	201	201	46	33.3728	-102.62	0.993	0.002	0.005
Y5	Yoakum Dunes WMA	152	160	183	187	227	235	236	236	166	174	184	198	150	158	202	218	176	191	201	201	46	33.3139	-102.614	0.9729	0.004	0.0231
JLB01		144	170	171	204	223	235	232	244	174	194	164	168	158	162	198	226	167	180	201	205	46	31.6631	-102.333	0.993	0.004	0.003
608		152	156	0	0	219	219	224	260	202	241	154	160	134	134	254	329	187	187	185	304	94	33.883	-106.639	0.011	0.986	0.003
609		183	207	192	216	219	219	252	260	218	253	162	174	134	150	226	250	187	199	304	327	19	33.887	-106.728	0.007	0.985	0.008
624		152	152	0	0	219	219	244	260	182	234	154	158	134	150	250	266	180	199	308	308	19	33.8362	-106.663	0.014	0.983	0.003
725		152	176	222	234	219	255	240	252	204	212	164	180	134	150	202	206	183	183	273	308	19	33.13	-107.142	0.009	0.989	0.002
726		152	182	200	200	243	243	244	244	194	234	174	180	134	150	206	214	170	183	185	185	19	33.1521	-107.077	0.006	0.99	0.004
727		166	178	202	234	219	231	244	244	190	190	160	184	134	150	210	238	191	191	185	240	19	33.1737	-107.041	0.0242	0.9728	0.003
C13R		137	182	204	204	219	227	224	232	162	190	180	186	142	142	198	254	176	183	201	201	34	31.529	-102.895	0.9901	0.0049	0.005
FG01		144	170	179	204	207	227	232	240	174	174	150	156	142	142	198	226	172	176	201	209	30	30.5937	-103.883	0.8974	0.002	0.1006
FG02		138	144	202	204	231	231	232	240	170	174	190	190	170	170	198	198	183	191	201	201	30	30.5937	-103.883	0.9845	0.003	0.0125
KK062		166	178	194	200	219	223	224	236	186	202	172	198	134	150	178	210	170	207	185	185	1	30.3843	-104.03	0.01	0.9878	0.0022
KK067		174	182	194	198	219	219	244	252	186	190	174	174	134	134	230	234	167	180	185	213	18	30.3891	-104.039	0.025	0.971	0.004
KK068		174	194	202	212	219	219	240	244	186	202	152	156	134	134	178	198	170	170	273	289	51	30.4067	-104.039	0.009	0.988	0.003
KK070		170	183	194	194	211	219	228	240	190	190	174	180	158	158	206	242	170	180	185	277	1	30.3782	-104.045	0.0356	0.9553	0.0091
NM17_PR01		152	156	0	0	219	219	236	236	204	212	204	220	150	150	290	293	155	170	201	201	104	31.8335	-109.009	0.006	0.99	0.004
NM17_PR02		152	152	0	0	219	219	228	228	194	234	164	196	150	150	0	0	155	170	201	209	6	31.8335	-109.009	0.0271	0.9699	0.003
NM210		174	176	194	194	215	219	224	224	190	190	148	148	134	134	190	194	170	176	185	261	5	32.2925	-106.993	0.008	0.9886	0.0034
NM310		174	178	194	210	247	251	224	244	186	198	176	180	150	150	210	210	176	183	245	277	19	32.2925	-106.993	0.0134	0.9816	0.005
SB01		166	176	200	200	219	227	232	232	170	182	154	154	134	134	190	190	176	180	277	277	30	31.0061	-105.554	0.008	0.987	0.005
SB02		166	176	183	200	219	227	236	236	182	182	154	172	134	134	198	206	172	172	185	253	30	30.9997	-105.547	0.0563	0.8882	0.0555
SB03		160	176	200	208	219	231	236	236	174	182	154	174	134	134	222	234	170	172	185	249	79	31.0789	-105.59	0.0419	0.9438	0.0143
ST1		160	186	190	194	215	223	240	244	190	194	148	152	142	154	198	198	167	172	205	265	30	30.1581	-102.227	0.942	0.039	0.019
BK1		144	178	179	202	191	235	232	244	178	194	180	196	154	162	202	214	155	170	201	221	59	31.1372	-100.94	0.9173	0.0631	0.0196
BK2		144	166	175	222	195	199	216	240	182	214	162	184	142	158	222	226	176	176	201	201	56	31.1214	-101.071	0.9644	0.0144	0.0212
BM1		174	178	183	194	199	199	232	244	170	186	156	164	162	162	230	234	155	183	197	264	59	30.5697	-99.4509	0.9875	0.0072	0.0053
KK001		144	144	171	198	215	223	220	228	190	198	154	156	142	146	198	242	187	199	201	205	38	31.168	-100.766	0.9939	0.0028	0.0033
KK002		166	170	175	190	235	239	224	244	182	186	158	188	146	154	230	242	187	187	201	217	55	31.009	-101.16	0.9937	0.003	0.0033
KK003		156	160	187	190	215	219	232	244	174	186	154	172	142	142	198	238	155	176	249	269	59	30.4842	-99.7719	0.9822	0.0088	0.009
KK004		144	160	187	194	219	227	240	244	214	222	142	198	158	158	208	230	155	176	201	201	28	30.4842	-99.7719	0.9821	0.0117	0.0062
KK005		160	166	190	220	215	227	232	244	182	206	138	150	142	150	214	222	176	176	201	249	59	30.4842	-99.7719	0.9522	0.0036	0.0442
KK006		156	166	187	198	215	223	236	236	182	214	150	154	142	158	208	238	176	176	197	197	59	30.4842	-99.7719	0.8414	0.005	0.1536
NDR1		144	144	171	190	215	215	236	240	182	194	166	196	142	162	206	226	155	172	197	201	46	31.8332	-100.522	0.9939	0.002	0.0041
NDR2		156	170	187	212	223	223	232	232	182	190	154	184	142	154	198	234	167	183	201	253	46	31.8568	-100.51	0.9833	0.004	0.0127
NDR3		166	170	183	190	191	219	236	240	158	190	154	170	154	162	202	222	155	180	197	201	46	31.8238	-100.527	0.9832	0.0113	0.0055
NDR4		160	166	212	220	199	219	232	244	178	186	186	196	154	162	202	210	172	180	201	201	69	31.8238	-100.527	0.9929	0.0041	0.003
NDR5		152	182	183	204	211	235	236	240	174	204	164	174	154	166	198	198	176	183	201	201	46	31.8238	-100.527	0.9881	0.0069	0.005
NDR6		144	160	171	202	219	219	232	244	174	178	146	192	142	154	218	222	161	172	201	201	70	31.8238	-100.527	0.9498	0.003	0.0472
NR01		166	174	171	187	215	223	224	232	178	194	154	178	142	154	218	230	172	176	201	241	46	31.8332	-100.522	0.9185	0.003	0.0785
WLH1324(6)		160	170	204	210	199	227	220	220	178	178	150	190	142	166	210	218	176	180	201	209	59	31.3825	-99.8784	0.9849	0.003	0.0121
KK036		144	170	171	204	219	239	240	244	178	186	182	194	142	162	198	226	167	180	201	201	46	33.4628	-102.638	0.994	0.003	0.003
KK037		152	166	187	200	199	235	232	232	154	170	172	204	154	166	198	198	155	172	201	201	46	33.4627	-102.638	0.9929	0.0031	0.004
DAS1		148	148	171	198	199	223	232	240	190	194	140	160	146	158	226	254	155	167	201	201	46	34.1059	-101.041	0.9929	0.0031	0.004
DAS2		144	160	212	212	199	231	236	248	166	182	144	184	150	154	198	238	172	176	201	205	46	34.003	-101.081	0.9919	0.003	0.0051
DAS3		144	144	187	194	223	223	236	244	178	194	140	192	154	166	246	254	155	172	201	201	28	34.1059	-101.041	0.9938	0.003	0.0032
DAS4		148	148	190	194	199	231	216	244	174	190	170	204	158	162	210	226	183	191	201	213	30	34.1059	-101.041	0.9799	0.0141	0.006
F03		144	144	183	190	211	227	228	236	170	198	148	190	158	162	210	218	172	183	241	285	46	34.5061	-101.017	0.8541	0.0043	0.1416
F04		156	178	190	194	215	219	236	236	178	198	152	182	162	162	198	202	167	180	197	201	39	34.4725	-101.079	0.9798	0.0122	0.008
LS01		170	174	171	206	211	223	228	236	178	178	140	168	142	158	198	206	172	172	201	201	46	33.6752	-101.983	0.9885	0.0065	0.005
LS02		144	152	171	187	199	227	236	240	170	186	180	190	142	154	198	222	176	176	201	217	46	33.6752	-101.983	0.991	0.003	0.006
LS03		144	144	171	190	215	223	228	236	178	190	140	160	154	154	198	202	165	176	201	201	46	33.6752	-101.983	0.994	0.003	0.003
NT1		156	160	204	208	219	239	240	240	170	182	174	186	142	154	226	234	165	176	201	209	11	32.6941	-102.259	0.9846	0.005	0.0104
NT2		144	178	171	190	219	235	232	252	190	194	168	184	142	158	210	250	176	180	201	201	46	32.6941	-102.259	0.9696	0.0265	0.0039
NT3		148	160	202	206	199	211	244	252	186	186	140	190	142	154	198	198	172	187	201	201	46	32.6937	-102.268	0.9794	0.0176	0.003
ABGF01		144	160	171	171	211	223	232	236	186	198	182	196	142	150	218	238	187	187	205	253	75	34.5478	-100.951	0.992	0.002	0.006
ABGF02		144	166	171	187	227	235	232	236	186	198	170	192	154	154	198	198	165	183	201	217	35	34.3756	-100.387	0.995	0.002	0.003
ABGF03		160	160	171	198	199	223	236	236	182	194	164	170	154	162	218	226	155	203	201	201	28	34.3119	-100.719	0.995	0.002	0.003
ABGF04		144	160	190	200	227	235	236	236	186	186	184	192	146	162	198	222	187	187	201	245	32	34.3814	-100.875	0.9832	0.005	0.0118
ABGF05		144	166	171	194	199	239	224	236	190	206	142	174	142	146	222	254	165	172	201	201	32	34.4753	-100.781	0.9931	0.002	0.0049
ABGF06		144	156	208	216	199	219	224	224	202	210	160	178	146	162	206	238	180	183	201	213	47	34.3178	-100.772	0.9616	0.0262	0.0122
ABGF07		156	182	171	171	199	215	232	252	186	194	156	172	154	158	194	270	180	187	197	201	30	34.1192	-100.761	0.938	0.053	0.009
ABGF11		144	156	183	183	219	223	244	244	174	190	174	186	154	166	218	218	176	180	197	201	46	34.1525	-100.704	0.9484	0.005	0.0466
BLOODSAMPLE2		160	182	187	204	223	227	232	232	166	170	152	178	142	146	218	254	172	180	201	273	28	32.1549	-100.431	0.3017	0.0083	0.69
BLOODSAMPLE3		170	170	187	190	223	223	224	236	186	190	150	168	154	154	202	210	161	180	201	201	46	31.8293	-100.086	0.969	0.004	0.027
CAR_74		144	144	198	202	199	227	232	240	170	186	160	178	158	158	206	226	172	180	201	205	46	35.3112	-101.561	0.989	0.004	0.007
CAR_75		148	148	216	220	215	219	228	232	182	194	168	184	154	162	214	218	165	172	201	201	35	35.3112	-101.561	0.991	0.004	0.005
F02		148	156	183	183	207	223	232	244	174	182	174	174	146	158	214	228	183	183	205	205	46	34.2968	-100.653	0.2728	0.008	0.7192
HEM_77		148	170	194	226	199	215	220	224	198	210	162	182	146	154	210	226	183	187	201	263	28	35.9123	-100.288	0.9831	0.0129	0.004
NDR7		160	160	171	198	203	219	224	228	174	190	154	174	146	158	230	270	172	176	249	264	28	33.382	-98.6388	0.972	0.0113	0.0167
NDR8		156	166	204	216	207	215	224	224	170	210	154	174	158	158	230	230	172	180	205	264	28	33.382	-98.6388	0.9147	0.0128	0.0725
PW1		156	166	171	200	211	211	224	228	166	174	158	182	142	162	206	214	172	180	237	261	22	32.3279	-99.8759	0.7208	0.004	0.2752
WLH1322(4)		178	178	183	190	219	227	232	236	190	202	138	150	146	158	198	198	167	176	201	225	2	32.2782	-100.376	0.7491	0.0781	0.1728
WLH1323(5)		160	166	175	204	227	227	232	236	178	178	142	158	142	154	202	222	172	183	201	217	28	32.1253	-100.41	0.9763	0.002	0.0217
K041		138	138	175	175	223	223	232	240	182	194	156	174	142	150	206	210	167	172	201	264	16	28.7254	-97.8162	0.0236	0.003	0.9734
K058		138	138	190	194	219	231	232	236	182	186	158	174	150	150	210	222	161	176	189	201	15	28.7206	-97.803	0.0449	0.0165	0.9386
K062		138	156	175	194	211	231	232	236	182	190	158	174	150	150	218	222	172	176	189	197	15	28.7194	-97.8051	0.0356	0.0069	0.9575
K065		138	138	175	183	223	223	236	236	178	210	150	150	146	146	212	246	161	172	219	241	26	28.8875	-97.7122	0.0319	0.002	0.9661
K100		166	166	175	194	211	215	216	236	166	194	152	152	150	150	214	258	167	180	229	264	15	28.7202	-97.8042	0.0336	0.008	0.9584
K114		138	138	175	190	215	215	216	240	194	194	150	158	146	154	216	216	159	195	201	229	81	28.9815	-98.0191	0.017	0.002	0.981
K115		138	138	175	190	219	219	216	240	190	194	152	152	146	154	214	216	159	195	229	229	81	28.9815	-98.0191	0.007	0.003	0.99
K115		166	166	171	190	211	211	216	232	182	214	146	180	138	158	218	218	172	172	197	264	28	28.8091	-97.8467	0.3217	0.004	0.6743
K117		138	166	187	194	211	211	216	232	178	182	156	180	142	150	198	214	172	172	197	233	28	28.8087	-97.8468	0.0668	0.0092	0.924
K119		144	156	175	187	211	211	216	240	190	194	152	188	146	154	214	214	167	195	229	233	81	28.9813	-98.0167	0.0568	0.002	0.9412
K120		138	138	175	183	211	223	228	240	178	178	144	148	150	154	206	218	167	180	197	201	26	28.9015	-97.9056	0.0171	0.002	0.9809
K121		156	166	171	183	211	211	240	240	178	210	156	174	138	142	218	218	172	172	189	257	33	28.8096	-97.8455	0.1466	0.002	0.8514
K122		138	166	175	204	207	211	216	216	166	182	152	160	154	162	208	222	151	176	237	237	26	28.8827	-97.897	0.0139	0.002	0.9841
K124		138	152	190	204	211	223	216	232	166	174	190	190	146	154	214	216	167	167	229	253	26	28.8883	-97.8983	0.0151	0.002	0.9829
K126		166	166	187	194	215	231	216	236	174	198	152	174	142	150	214	246	172	180	233	233	21	28.7197	-97.8048	0.0851	0.0232	0.8917
KK007		138	160	228	228	195	211	232	232	162	174	150	188	138	146	226	262	159	167	205	229	24	26.2875	-97.3851	0.0151	0.002	0.9829
KK008		166	166	183	187	211	211	232	232	174	174	156	188	146	154	210	218	159	172	213	269	24	26.2875	-97.3851	0.015	0.003	0.982
KK009		138	138	183	183	195	207	232	232	170	174	144	146	142	146	222	226	172	180	197	217	24	26.2875	-97.3851	0.008	0.001	0.991
MR_1		138	138	187	190	211	215	228	232	162	170	174	174	150	150	218	242	167	172	217	225	21	28.7259	-97.8446	0.009	0.002	0.989
MR_2		148	170	187	204	211	211	216	228	162	170	144	152	150	154	214	222	167	172	225	225	34	28.7259	-97.8446	0.0171	0.003	0.9799

## Sheet: Coordinates for 16 sites
Site	Site #	Latitude	Longitude
Brewster Co.	1	30.0609	-103.507
Hueco Tanks SP	2	31.925	-106.041
Seminole Canyon SP	3	29.6912	-101.318
Midland Co.	4	32.0831	-102.106
Camp Bowie	5	31.6343	-98.9432
Mitchell	6	32.4363	-100.95
Grey	7	35.432	-100.792
Yoakum Dunes WMA	8	33.358	-102.618
Matador WMA	9	34.1091	-100.359
RPQRR	10	32.7167	-100.561
CMA	11	35.4197	-101.947
Chaparral WMA	12	28.3149	-99.3897
Starr	13	26.5333	-98.6149
Matagorda Island WMA	14	28.1833	-96.6915
Colorado	15	37.5903	-102.539
E. New Mexico	16	32.4558	-103.091
